# Supplementary material for: Green Synthesis and Molecular Docking Study of Some New Thiazoles Using Terephthalohydrazide Chitosan Hydrogel as Ecofriendly Biopolymeric Catalyst
Source: MDPI journal article supplement (doi:10.3390/catal13091311), 2023-09-20

## Supplementary File

### Green Synthesis and Molecular docking Study of Some New Thiazoles using Terephthalohydrazide Chitosan Hydrogel as Ecofriendly Biopolymeric Catalyst

Jehan Y. Al-Humaidi<sup>1</sup>, Sobhi M. Gomha<sup>2\*</sup>, Nahed A. Abd El-Ghany<sup>3\*</sup>, Basant Farag<sup>4</sup>, Magdi E. A. Zaki<sup>5</sup>, Tariq Z. Abolibda<sup>2</sup>, Nadia A. Mohamed<sup>3,6</sup>

<sup>1</sup> Department of Chemistry, College of Science, Princess Nourah bint Abdulrahman University, P.O .BOX 84428, Riyadh 11671, Saudi Arabia, jyalhamidi@pnu.edu.sa.

<sup>2</sup> Department of Chemistry, Faculty of Science, Islamic University of Madinah, Madinah 42351, Saudi Arabia

<sup>3</sup> Department of Chemistry, Faculty of Science, Cairo University, Giza, 12613, Egypt.

<sup>4</sup> Department of Chemistry, Faculty of Science, Zagazig University, Zagazig 44519, Egypt.

<sup>5</sup> Department of Chemistry, Faculty of Science, Imam Mohammad Ibn Saud Islamic University (IMSIU), Riyadh 11623, Saudi Arabia; mezaki@imamu.edu.sa

<sup>6</sup> Department of Chemistry, College of Science, Qassim University, Buraidah 51452, Saudi Arabia

\*Correspondence: smgomha@iu.edu.sa; abdelghany@sci.cu.edu.eg

## Contents

| No. | Spectra                                               | No. | Spectra                                            |
|-----|-------------------------------------------------------|-----|----------------------------------------------------|
| 1   | <sup>1</sup> H NMR spectra of compound <b>2b</b>      | 16  | <sup>1</sup> H NMR spectra of compound <b>5h</b>   |
| 2   | <sup>13</sup> C NMR NMR spectra of compound <b>2b</b> | 17  | Mass spectra of compound <b>5h</b>                 |
| 3   | <sup>13</sup> C NMR spectra of compound <b>5a</b>     | 18  | <sup>1</sup> H NMR spectra of compound <b>7a</b>   |
| 4   | <sup>1</sup> H NMR spectra of compound <b>5a</b>      | 19  | <sup>13</sup> C NMR spectra of compound <b>7b</b>  |
| 5   | <sup>1</sup> H NMR spectra of compound <b>5b</b>      | 20  | <sup>1</sup> H NMR spectra of compound <b>9d</b>   |
| 6   | <sup>13</sup> C NMR spectra of compound <b>5d</b>     | 21  | Mass spectra of compound <b>9d</b>                 |
| 7   | <sup>1</sup> H NMR spectra of compound <b>5d</b>      | 22  | <sup>13</sup> C NMR spectra of compound <b>9e</b>  |
| 8   | <sup>1</sup> H NMR spectra of compound <b>5e</b>      | 23  | <sup>1</sup> H NMR spectra of compound <b>9e</b>   |
| 9   | Mass spectra of compound <b>5e</b>                    | 24  | <sup>1</sup> H NMR spectra of compound <b>9f</b>   |
| 10  | <sup>13</sup> C NMR Spectra of compound <b>5f</b>     | 25  | Mass spectra of compound <b>9f</b>                 |
| 11  | <sup>1</sup> H NMR spectra of compound <b>5f</b>      | 26  | <sup>13</sup> C NMR spectra of compound <b>9g</b>  |
| 12  | <sup>13</sup> C NMR Spectra of compound <b>5g</b>     | 27  | <sup>1</sup> H NMR spectra of compound <b>9g</b>   |
| 13  | <sup>1</sup> H NMR spectra of compound <b>5g</b>      | 28  | Mass spectra of compound <b>9g</b>                 |
| 14  | Mass spectra of compound <b>5g</b>                    | 29  | <sup>13</sup> C NMR spectra of compound <b>11b</b> |
| 15  | <sup>13</sup> C NMR Spectra of compound <b>5h</b>     | 30  | <sup>1</sup> H NMR spectra of compound <b>11b</b>  |

## 2.1. Chemicals and Materials

Chitosan (degree of deacetylation 88% and molecular weight of 200000 g mol<sup>-1</sup>) was purchased from Funakoshi Co. LTD (Japan). Benzaldehyde, epichlorohydrin, terephthalohydrazide, 2-acetylthiophene, hydrazine hydrate, phenylisothiocyanate, thiosemicarbazide, phenacylbromide, acetylacetone, ethylacetoacetate, aniline, 4-chloroaniline, 4-bromoaniline, 4-anisidine, 4-toluidine, sulphuryl chloride, ether, absolute ethanol, dimethylformamide, 4-chloroacetophenone, 4-bromoacetophenone, 4-methylacetophenone, 4-methoxyacetophenone, 3-nitroacetophenone, glacial acetic acid were provided by Alfa Aesar (UK) and Sigma-Aldrich (Germany) and were of analytical grade and used as received. All chemicals and reagents were purchased from Funakoshi Co. LTD (Japan), Alfa Aesar (UK) and Sigma-Aldrich (Germany) and were of analytical grade and used as received.

## 2.2. Measurements

IR spectra were recorded in potassium bromide discs on Pye Unicam SP 3300 and Shimadzu FTIR 8101 PC infrared spectrophotometers. The Shimadzu GCMS-QP1000 EX mass spectrometer was used to record mass spectra at 70 eV. . The <sup>1</sup>H-NMR and <sup>13</sup>C-NMR spectra were recorded using a Jeol-500 spectrometer (500 MHz for <sup>1</sup>H-NMR and 125 MHz for <sup>13</sup>C-NMR). On a digital melting point device from the Electrothermal IA 9000 series, melting points were calculated. FTIR spectra of chitosan and TcsSB were given using KBr pellets with a range of 400 to 4000 cm<sup>-1</sup> by a Tescan Shimadzu FTIR spectrophotometer, Model 8000, Japan. X-ray diffractometer (Brucker's D-8) was used to determine the internal structure of chitosan and TCsSB hydrogel. The samples were scanned at a various angle, 2θ, in the range between 3° and 70° at 80 min<sup>-1</sup> speed at room temperature. The source of the X-ray (1.5406 °A, 40 kV, 30 mA) was made by CuKα radiation filtered by a nickel. Chitosan and TCsSB surface morphology was scanned using a Quanta scanning electron microscope (model FEG 250). Before scanning the samples were sputtered with gold.

The physical constants and analytical information for the known products **5a-d**, **9a-c**, and **11a** are listed below.

**4-Methyl-5-(phenyldiazenyl)-2-(2-(1-(thiophen-2-yl)ethylidene)hydrazinyl)thiazole (5a)**

Red solid; mp 183-185 °C (DMF); IR (KBr)  $\nu_{\text{max}}$ : 3427 (NH), 3043 (=C-H), 2931 (-C-H), 1603 (C=N)  $\text{cm}^{-1}$ ;  $^1\text{H}$  NMR (DMSO- $d_6$ )  $\delta$ : 2.50 (s, 3H, CH<sub>3</sub>), 2.58 (s, 3H, CH<sub>3</sub>), 6.99-7.75 (m, 8H, ArH), 10.67 (s, 1H, D<sub>2</sub>O-exchangeable, NH);  $^{13}\text{C}$  NMR (75 MHz, DMSO- $d_6$ )  $\delta$ : 8.5, 15.5 (CH<sub>3</sub>), 114.2, 122.1, 128.0, 128.3, 129.2, 130.2, 130.8, 137.9, 143.4 (Ar-C), 160.4, 170.6, 177.6 (C=N) ppm; MS  $m/z$  (%): 341 (M<sup>+</sup>, 44), 238 (71), 106 (53), 78 (82), 51 (100); Anal. Calcd. for C<sub>16</sub>H<sub>15</sub>N<sub>5</sub>S<sub>2</sub> (341.08): C, 56.28; H, 4.43; N, 20.51; Found: C, 56.22; H, 4.36; N, 20.40%.

**4-Methyl-2-(2-(1-(thiophen-2-yl)ethylidene)hydrazinyl)-5-(*p*-tolyl diazenyl)thiazole (5b)**

Red solid; mp 169-170 °C (DMF); IR (KBr)  $\nu_{\text{max}}$ : 3427 (NH), 3042 (=C-H), 2928 (-C-H), 1602 (C=N)  $\text{cm}^{-1}$ ;  $^1\text{H}$  NMR (DMSO- $d_6$ )  $\delta$ : 2.25 (s, 3H, CH<sub>3</sub>), 2.50 (s, 3H, CH<sub>3</sub>), 2.56 (s, 3H, CH<sub>3</sub>), 7.12-7.73 (m, 7H, Ar-H), 10.60 (s, 1H, D<sub>2</sub>O-exchangeable, NH) ppm;  $^{13}\text{C}$ -NMR (75 MHz, DMSO- $d_6$ )  $\delta$ : 8.5, 15.5, 20.3 (CH<sub>3</sub>), 114.2, 128.0, 129.6, 130.0, 130.7, 131.1, 137.3, 141.1, 142.7 (Ar-C), 160.1, 177.3, 170.8 (C=N); MS  $m/z$  (%): 355 (M<sup>+</sup>, 20), 238 (53), 185 (77), 78 (69), 51 (100); Anal. Calcd. for C<sub>17</sub>H<sub>17</sub>N<sub>5</sub>S<sub>2</sub> (355.09): C, 57.44; H, 4.82; N, 19.70; Found: C, 57.36; H, 4.77; N, 19.63%.

**5-((4-Chlorophenyl)diazenyl)-4-methyl-2-(2-(1-(thiophen-2-yl)ethylidene)hydrazinyl)thiazole (5c)**

Red solid; mp 216-218 °C (DMF); IR (KBr)  $\nu_{\text{max}}$ : 3427 (NH), 3043 (=C-H), 2931 (-C-H), 1603 (C=N)  $\text{cm}^{-1}$ ;  $^1\text{H}$  NMR (DMSO- $d_6$ )  $\delta$ : 2.51 (s, 3H, CH<sub>3</sub>), 2.57 (s, 3H, CH<sub>3</sub>), 7.17-7.74 (m, 7H, Ar-H), 10.71 (s, 1H, D<sub>2</sub>O-exchangeable, NH) ppm;  $^{13}\text{C}$ -NMR (75 MHz, DMSO- $d_6$ )  $\delta$ : 8.5, 15.4 (CH<sub>3</sub>), 115.6, 125.6, 128.0, 128.3, 129.1, 129.3, 138.7, 142.4, 142.5 (Ar-C), 160.6, 170.4, 177.6 (C=N) ppm; MS  $m/z$  (%): 377 (M<sup>+</sup> + 2, 32), 375 (M<sup>+</sup>, 100), 222 (54), 186 (72), 78 (69), 51 (80); Anal. Calcd. for C<sub>16</sub>H<sub>14</sub>ClN<sub>5</sub>S<sub>2</sub> (375.04): C, 51.12; H, 3.75; N, 18.63; Found: C, 51.03; H, 3.66; N, 18.51%.

**5-((4-Bromophenyl)diazenyl)-4-methyl-2-(2-(1-(thiophen-2-yl)ethylidene)hydrazinyl) thiazole (5d)**

Red solid; mp 203-205 °C (DMF); IR (KBr)  $\nu_{\text{max}}$ : 3441 (NH), 3043 (=C-H), 2937 (-C-H), 1601 (C=N)  $\text{cm}^{-1}$ ;  $^1\text{H}$  NMR (DMSO- $d_6$ )  $\delta$ : 2.51(s, 3H, CH<sub>3</sub>), 2.57 (s, 3H, CH<sub>3</sub>), 7.17-7.75 (m, 7H, Ar-H), 10.72 (s, 1H, D<sub>2</sub>O-exchangeable, NH) ppm;  $^{13}\text{C}$ -NMR (75 MHz, DMSO- $d_6$ )  $\delta$ : 8.5, 15.5 (CH<sub>3</sub>),

116.1, 128.0, 130.3, 130.9, 131.9, 132.1, 138.8, 142.5, 142.8 (Ar-C), 160.6, 170.4, 177.6 (C=N) ppm; MS  $m/z$  (%): 421 ( $M^+ + 2$ , 18), 419 ( $M^+$ , 19), 302 (100), 185 (83), 78 (82), 51 (74); Anal. Calcd. for  $C_{16}H_{14}BrN_5S_2$  (418.99): C, 45.72; H, 3.36; N, 16.66; Found: C, 45.55; H, 3.30; N, 16.42%.

#### **4-Phenyl-2-(2-(1-(thiophen-2-yl)ethylidene)hydrazineyl)thiazole (9a).**

Yellow crystals; mp 258-260 °C (DMF); IR (KBr)  $\nu_{\max}$ : 3219, 3116 (NH), 3030 (=C-H), 2977 (-C-H), 1613 (C=N)  $\text{cm}^{-1}$ ;  $^1\text{H-NMR}$  (DMSO- $d_6$ )  $\delta$ : 2.33 (s, 3H,  $\text{CH}_3$ ), 7.05–7.07 (m, 1H, Ar-H), 7.29–7.31 (m, 2H, Ar-H), 7.38–7.40 (m, 3H, Ar-H), 7.52 (s, 1H, Thiazole-H<sub>5</sub>), 7.85–7.87 (m, 2H, Ar-H) ppm; Anal. Calcd. for  $C_{15}H_{13}N_3S_2$  (299.4): C, 60.17; H, 4.38; N, 14.03. Found: C, 59.88; H, 4.28; N, 13.89%.

#### **4-(4-Methoxyphenyl)-2-(2-(1-(thiophen-2-yl)ethylidene)hydrazineyl)thiazole (9b).**

Yellow crystals; mp 249-251 °C (DMF); IR (KBr)  $\nu_{\max}$ : 3219, 3116 (NH), 3030 (=C-H), 2977 (-C-H), 1613 (C=N)  $\text{cm}^{-1}$ ;  $^1\text{H-NMR}$  (DMSO- $d_6$ )  $\delta$ : 2.33 (s, 3H,  $\text{CH}_3$ ), 2.49 (s, 3H,  $\text{OCH}_3$ ), 6.95-7.07 (m, 3H, Ar-H), 7.12 (s, 1H, Thiazole-H<sub>5</sub>), 7.38-7.40 (m, 2H, Ar-H), 7.77-7.79 (m, 2H, Ar-H), 11.02 (bs, 1H, NH,  $\text{D}_2\text{O}$ -exchangeable) ppm. Anal. Calcd. for  $C_{15}H_{13}N_3S_2$  (329.44): C, 58.33; H, 4.59; N, 12.76. Found: C, 58.24; H, 4.39; N, 12.67%.

#### **4-(3-Nitrophenyl)-2-(2-(1-(thiophen-2-yl)ethylidene)hydrazineyl)thiazole (9c).**

Yellow crystals; mp 246-248 °C (DMF); IR (KBr)  $\nu_{\max}$ : 3215 (NH), 3042, (=C-H), 2924 (-C-H), 1614 (C=N)  $\text{cm}^{-1}$ ;  $^1\text{H-NMR}$  (DMSO- $d_6$ )  $\delta$ : 2.28 (s, 3H,  $\text{CH}_3$ ), 7.04 (s, 1H, Thiazole-H<sub>5</sub>), 7.32–7.41 (m, 1H, Ar-H), 7.45–7.52 (m, 1H, Ar-H), 7.62–7.82 (m, 1H, Ar-H), 7.89 (d, 1H, Ar-H), 8.15–8.30 (m, 1H, Ar-H), 8.35 (d, 1H, Ar-H), 8.57–8.78 (m, 1H, Ar-H) ppm; Anal. Calcd. for  $C_{15}H_{12}N_4O_2S_2$  (344.4): C, 52.31; H, 3.51; N, 16.27. Found: C, 52.09; H, 3.59; N, 16.16%.

#### **1-(4-Methyl-2-(2-(1-(thiophen-2-yl)ethylidene)hydrazineyl)thiazol-5-yl)ethan-1-one (11a).**

Yellow crystals, mp 218-220 °C (DMF); IR (KBr)  $\nu_{\max}$ : 3342 (NH), 2919 (-C-H), 1652 (C=O), 1611 (C=N)  $\text{cm}^{-1}$ ;  $^1\text{H-NMR}$  (DMSO- $d_6$ )  $\delta$ : 2.33 (s, 3H,  $\text{CH}_3$ ), 2.39 (s, 3H,  $\text{CH}_3$ ), 2.48 (s, 3H,  $\text{CH}_3$ ), 7.06–7.08 (dd, 1H, Ar-H), 7.42 (d, 1H, Ar-H), 7.54–7.55 (dd, 1H, Ar-H) ppm; Anal. Calcd. for  $C_{12}H_{13}N_3OS_2$  (279.4): C, 51.59; H, 4.69; N, 15.04. Found: C, 51.34; H, 4.60; N, 14.89%.

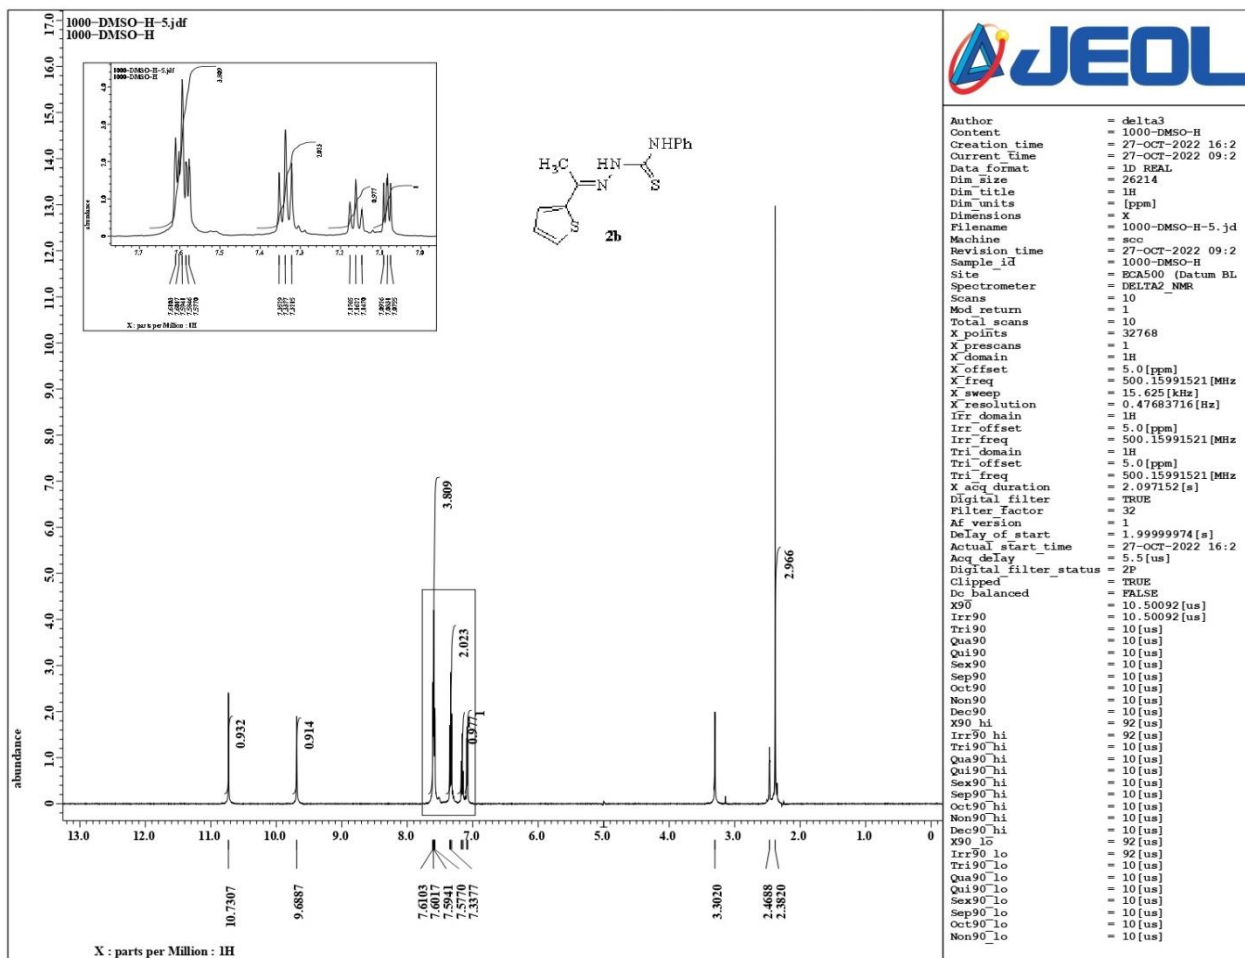

<sup>1</sup>H-NMR spectra of compound **2b**

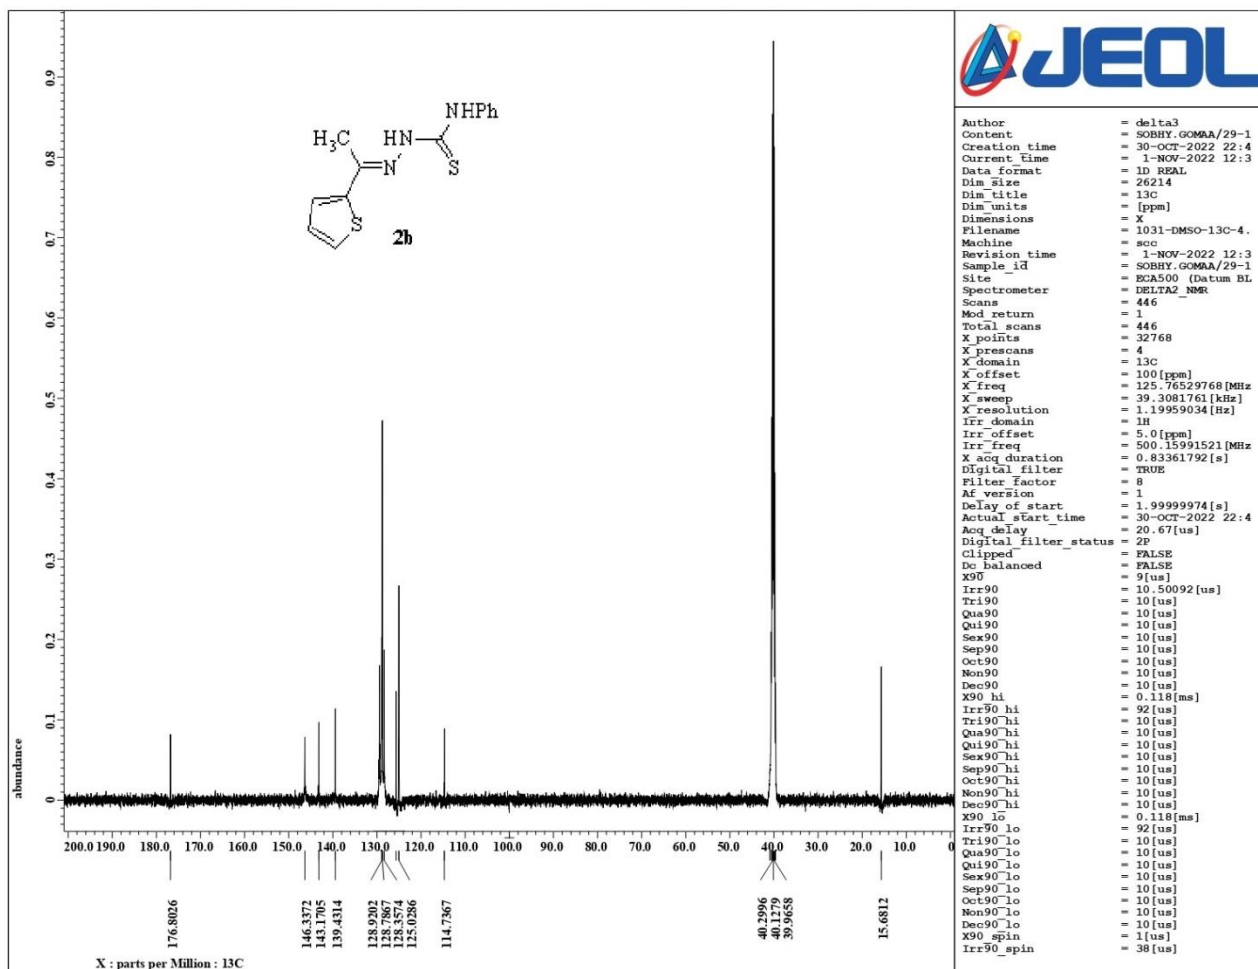

$^{13}\text{C}$ -NMR spectra of compound **2b**

<sup>13</sup>C decoupled spectrum TE42 in DMSO

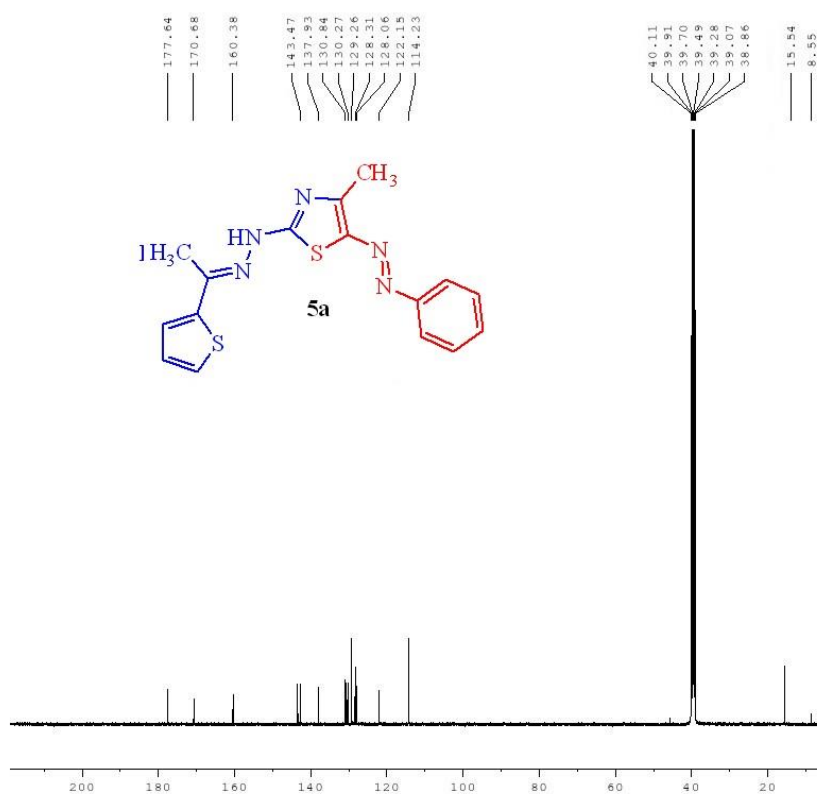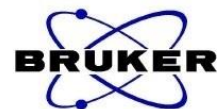

Current Data Parameters  
NAME TE42  
EXPNO 2  
PROCNO 1

F2 - Acquisition Parameters  
Date\_ 20150923  
Time 23.25  
INSTRUM spect  
PROBHD 5 mm QNP 1H/13  
PULPROG zgpg30  
TD 65536  
SOLVENT DMSO  
NS 8192  
DS 4  
SWH 23980.814 Hz  
FIDRES 0.365918 Hz  
AQ 1.3664756 sec  
RG 16384  
DW 20.850 usec  
DE 6.00 usec  
TE 296.2 K  
D1 2.00000000 sec  
d11 0.03000000 sec  
DELTA 1.89999998 sec  
TD0 1

===== CHANNEL f1 =====  
NUC1 13C  
P1 7.00 usec  
PL1 -6.00 dB  
SFO1 100.6228298 MHz

===== CHANNEL f2 =====  
CPDPRG2 waltz16  
NUC2 1H  
PCPD2 80.00 usec  
PL2 -2.00 dB  
PL12 15.50 dB  
PL13 18.50 dB  
SFO2 400.1316005 MHz

F2 - Processing parameters  
SI 32768  
SF 100.6128177 MHz  
WDW EM  
SSB 0  
LB 1.00 Hz  
GB 0  
PC 1.40

<sup>13</sup>C-NMR spectra of compound 5a

<sup>1</sup>H spectrum TE42 in DMSO

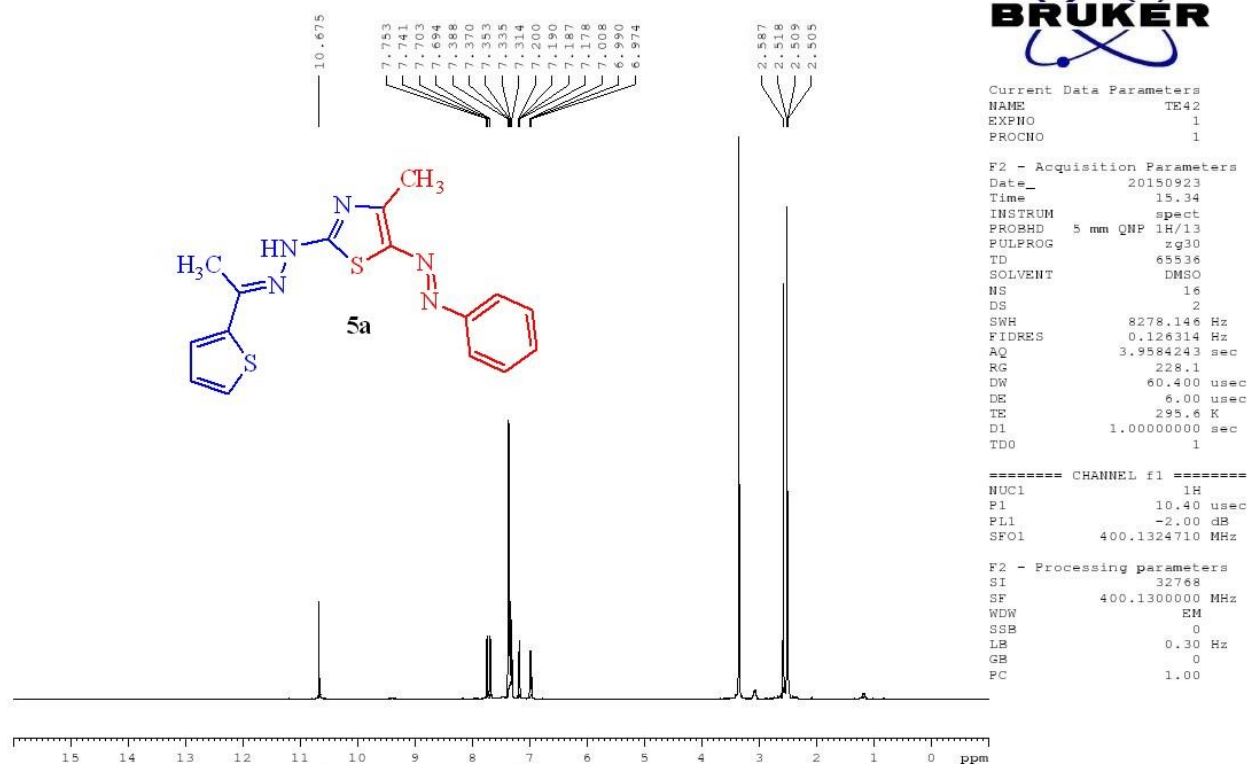

<sup>1</sup>H-NMR spectra of compound 5a

<sup>1</sup>H spectrum TE 41 in DMSO

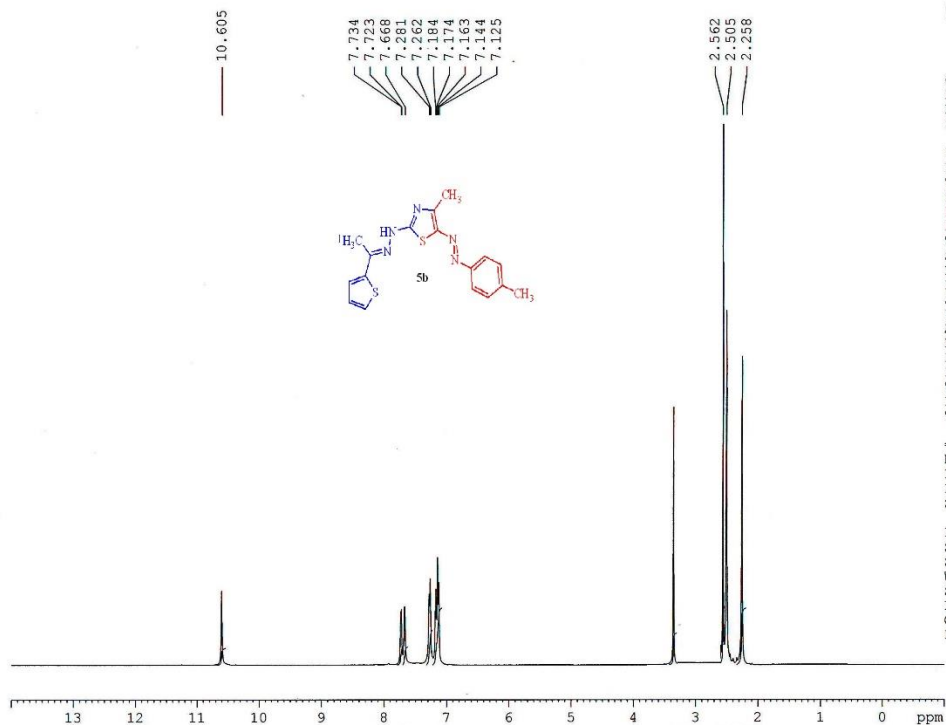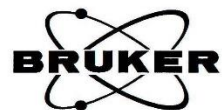

Current Data Parameters  
NAME TE41  
EXPNO 1  
PROCNO 1

F2 - Acquisition Parameters  
Date\_ 20150804  
Time\_ 13.24  
INSTRUM spect  
PROBHD 5 mm QNP 1H/13  
PULPROG zg30  
TD 65536  
SOLVENT DMSO  
NS 16  
DS 2  
SWH 8278.146 Hz  
FIDRES 0.126314 Hz  
AQ 3.9584243 sec  
RG 143.7  
DW 60.400 usec  
DE 6.00 usec  
TE 297.7 K  
D1 1.00000000 sec  
TD0 1

===== CHANNEL f1 =====  
NUC1 1H  
P1 10.40 usec  
PL1 -2.00 dB  
SFO1 400.1324710 MHz

F2 - Processing parameters  
SI 32768  
SF 400.1300000 MHz  
WDW EM  
SSB 0  
LB 0.30 Hz  
GB 0  
PC 1.00

<sup>1</sup>H-NMR spectra of compound **5b**

$^{13}\text{C}$  decoupled spectrum TE45 in DMSO

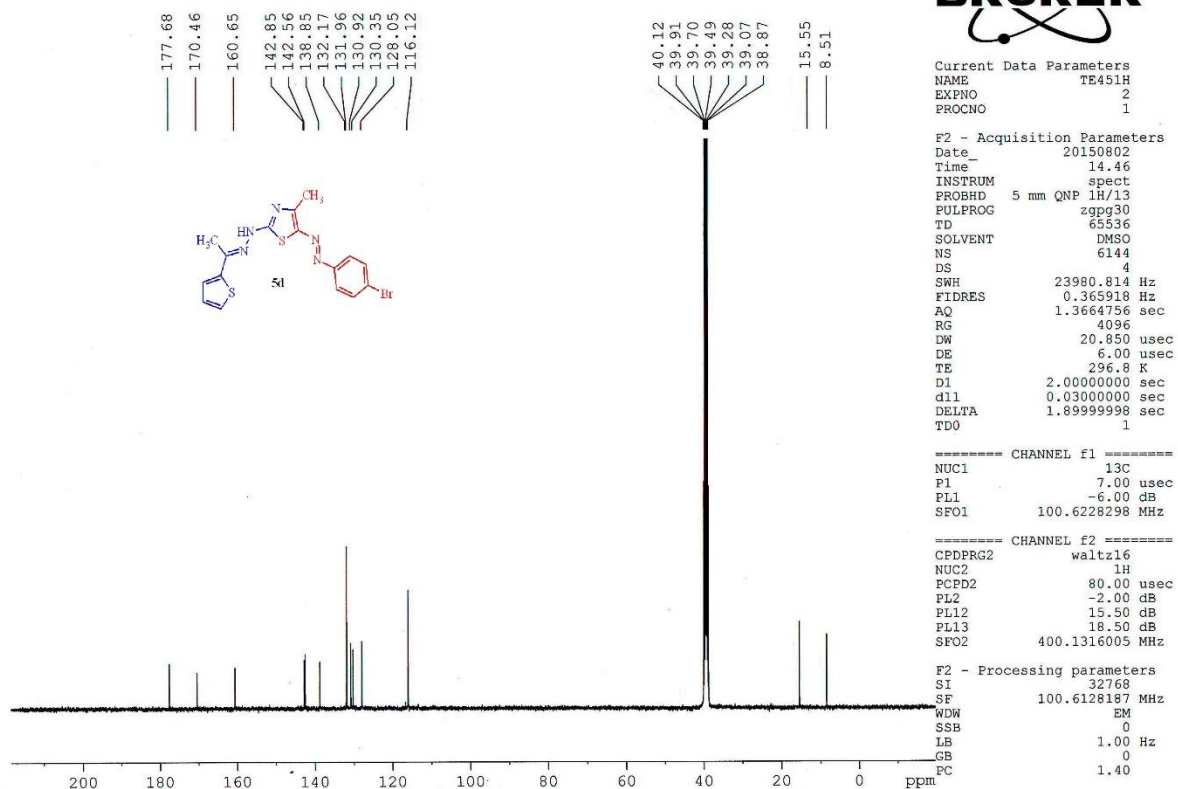

$^{13}\text{C}$ -NMR spectra of compound 5d

<sup>1</sup>H spectrum TE45 in DMSO

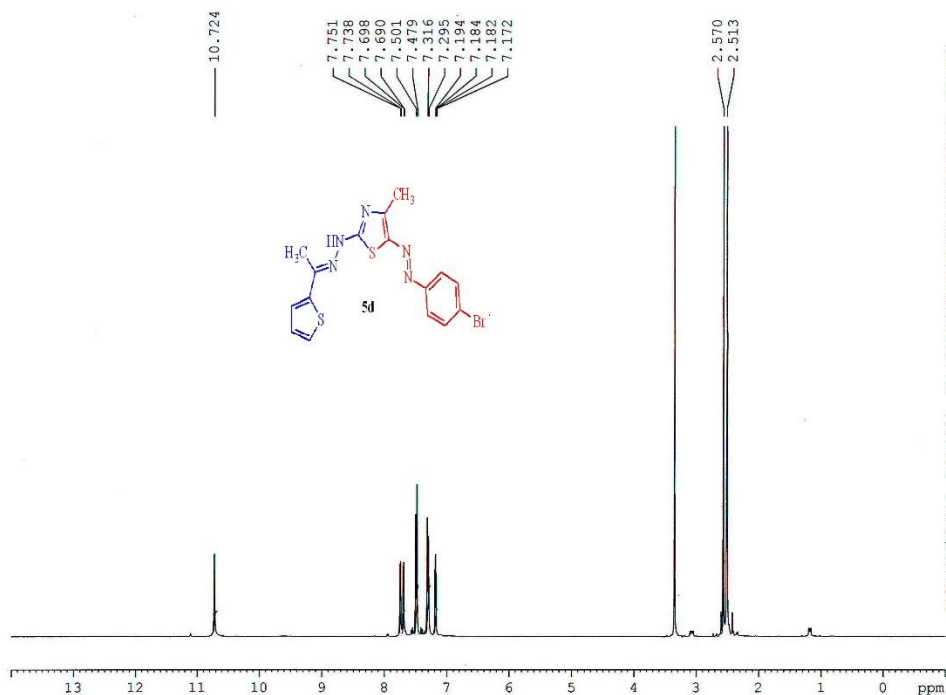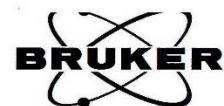

Current Data Parameters  
NAME TE451H  
EXPNO 1  
PROCNO 1

F2 - Acquisition Parameters  
Date\_ 20150802  
Time\_ 14.40  
INSTRUM spect  
PROBHD 5 mm QNP 1H/13  
FULPROG zg30  
TD 65536  
SOLVENT DMSO  
NS 16  
DS 2  
SWH 8278.146 Hz  
FIDRES 0.126314 Hz  
AQ 3.9584243 sec  
RG 203.2  
DW 60.400 usec  
DE 6.00 usec  
TE 296.4 K  
D1 1.00000000 sec  
TD0 1

===== CHANNEL f1 =====  
NUC1 1H  
P1 10.40 usec  
PL1 -2.00 dB  
SFO1 400.1324710 MHz

F2 - Processing parameters  
SI 32768  
SF 400.1300000 MHz  
WDW EM  
SSB 0  
LB 0.30 Hz  
GB 0  
PC 1.00

<sup>1</sup>H-NMR spectra of compound 5d

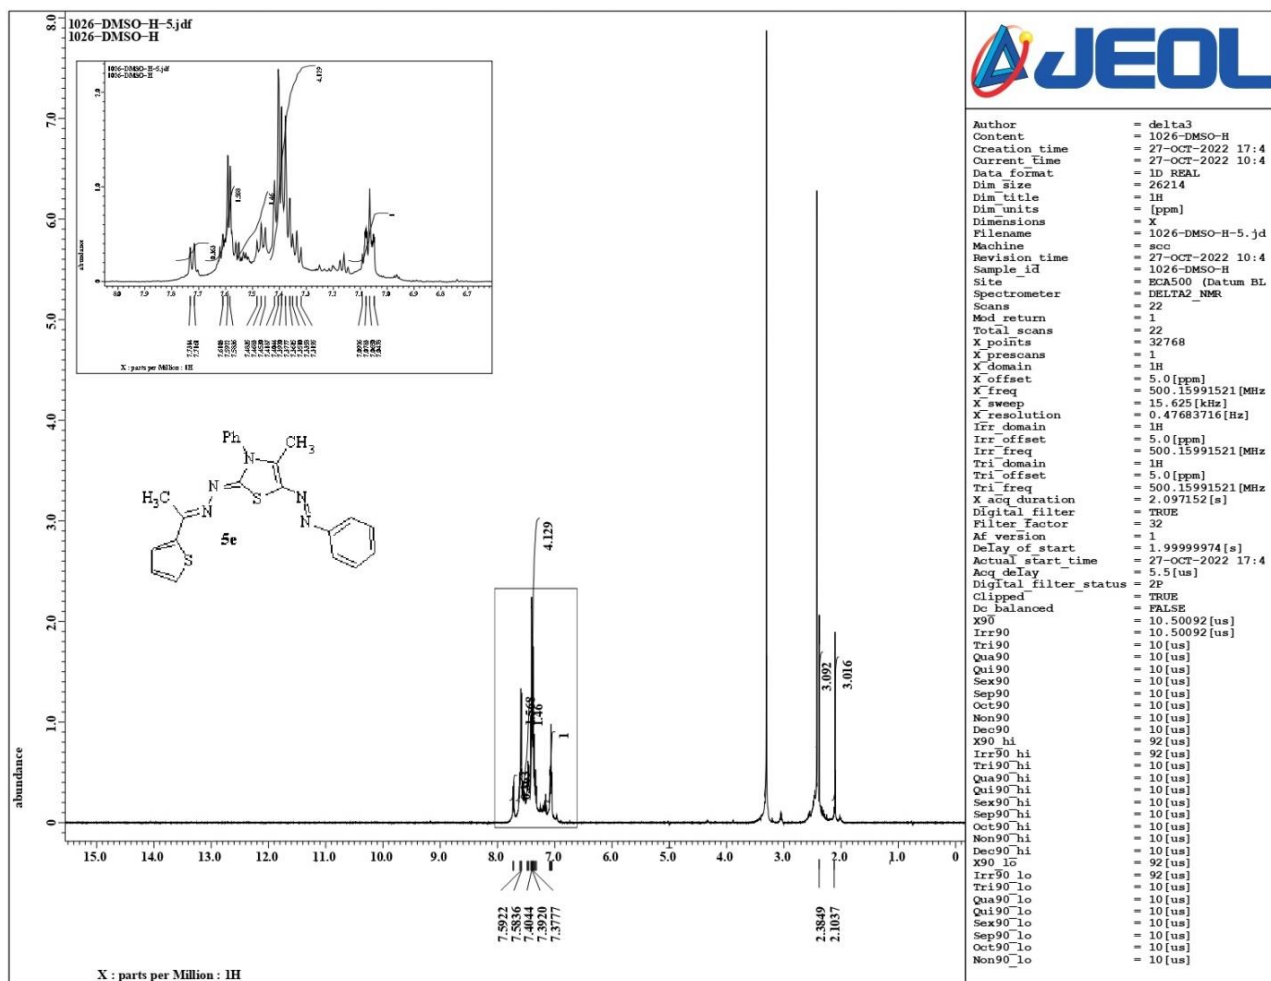

<sup>1</sup>H-NMR spectra of compound **5e**

# Cairo University Micro Analytical Center

## DI Analysis Shimadzu Qp-2010 Plus

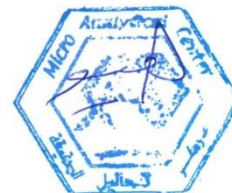

### Sample Information

Analyzed by : Dr. Mai Younis  
 Analyzed :  
 Sample Name : 18  
 Sample ID :  
 Customer Name : Dr. Sobhy Goma - Science - Cairo  
 Data File : C:\GCMSsolution\Data\Project1\18.QGD  
 Org Data File : C:\GCMSsolution\Data\Project1\18.QGD  
 Method File : C:\GCMSsolution\Data\Project1\High Temperature Op  
 Org Method File : C:\GCMSsolution\Data\Project1\High Temperature Op  
 Report File :  
 Tuning File : C:\GCMSsolution\System\Tune1\\_default.qgt  
 SEndIf\$Modified by : Dr. Mai Younis  
 Modified :

### Method

==== Analytical Line 1 =====  
 IonSourceTemp :250.00 °C  
 [MS Table]  
 --Group 1 - Event 1--  
 Start Time :0.00min  
 End Time :10.00min  
 ACQ Mode :Scan  
 Event Time :0.50sec  
 Scan Speed :1250  
 Start m/z :50.00  
 End m/z :600.00  
 Electron Voltage : 70 eV  
 Ionization Mode : EI

C:\GCMSsolution\Data\Project1\18.QGD

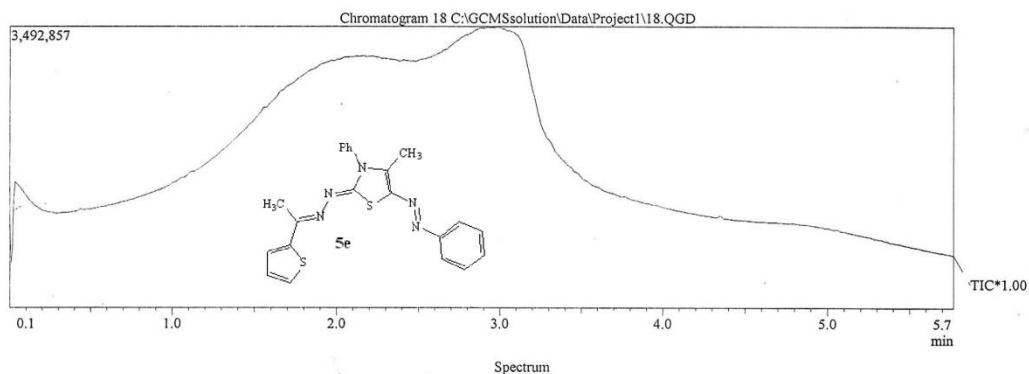

Line#:1 R.Time:2.8(Scan#:339)

MassPeaks:

RawMode:Single 2.8(339) BasePeak:121(668201)

BG Mode:None Group 1 - Event 1

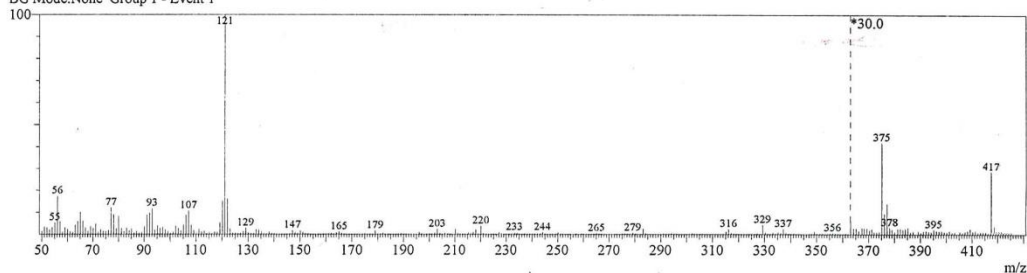

Mass Table

Line#:1 R.Time:2.8(Scan#:339)

MassPeaks:

RawMode:Single 2.8(339) BasePeak:121(668201)

BG Mode:None Group 1 - Event 1

| # | m/z   | Abs. In | Rel. Int. | # | m/z   | Abs. In | Rel. Int. | # | m/z   | Abs. In | Rel. Int. |
|---|-------|---------|-----------|---|-------|---------|-----------|---|-------|---------|-----------|
| 1 | 50.05 | 8443    | 1.26      | 4 | 53.05 | 14413   | 2.16      | 7 | 56.10 | 116538  | 17.44     |
| 2 | 51.05 | 21744   | 3.25      | 5 | 54.05 | 20460   | 3.06      | 8 | 57.10 | 38148   | 5.71      |
| 3 | 52.05 | 19734   | 2.95      | 6 | 55.10 | 35018   | 5.24      | 9 | 58.10 | 6788    | 1.02      |

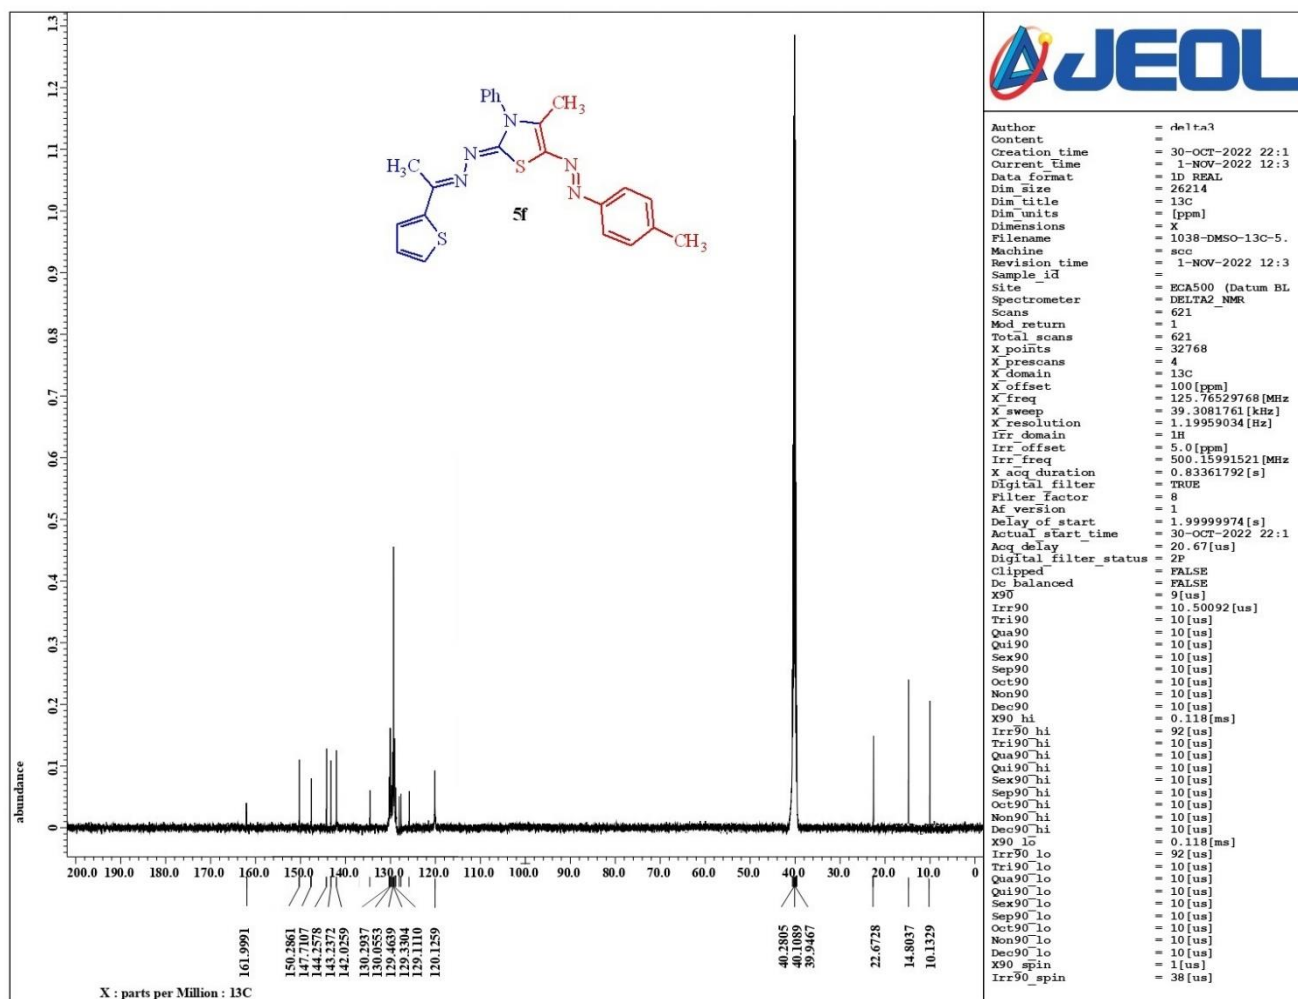

<sup>13</sup>C-NMR spectra of compound **5f**

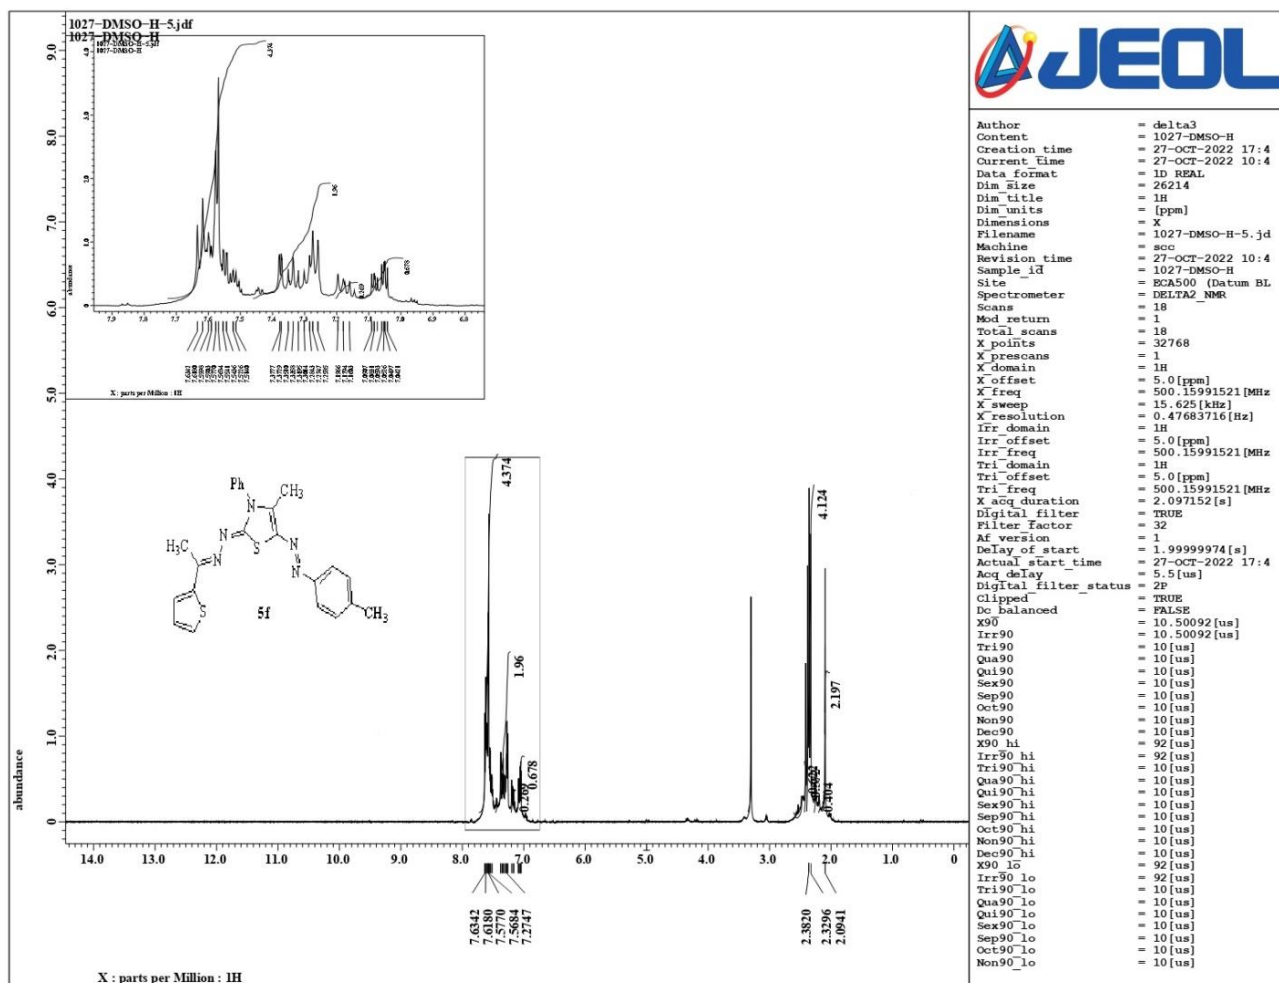

$^1\text{H}$ -NMR spectra of compound **5f**

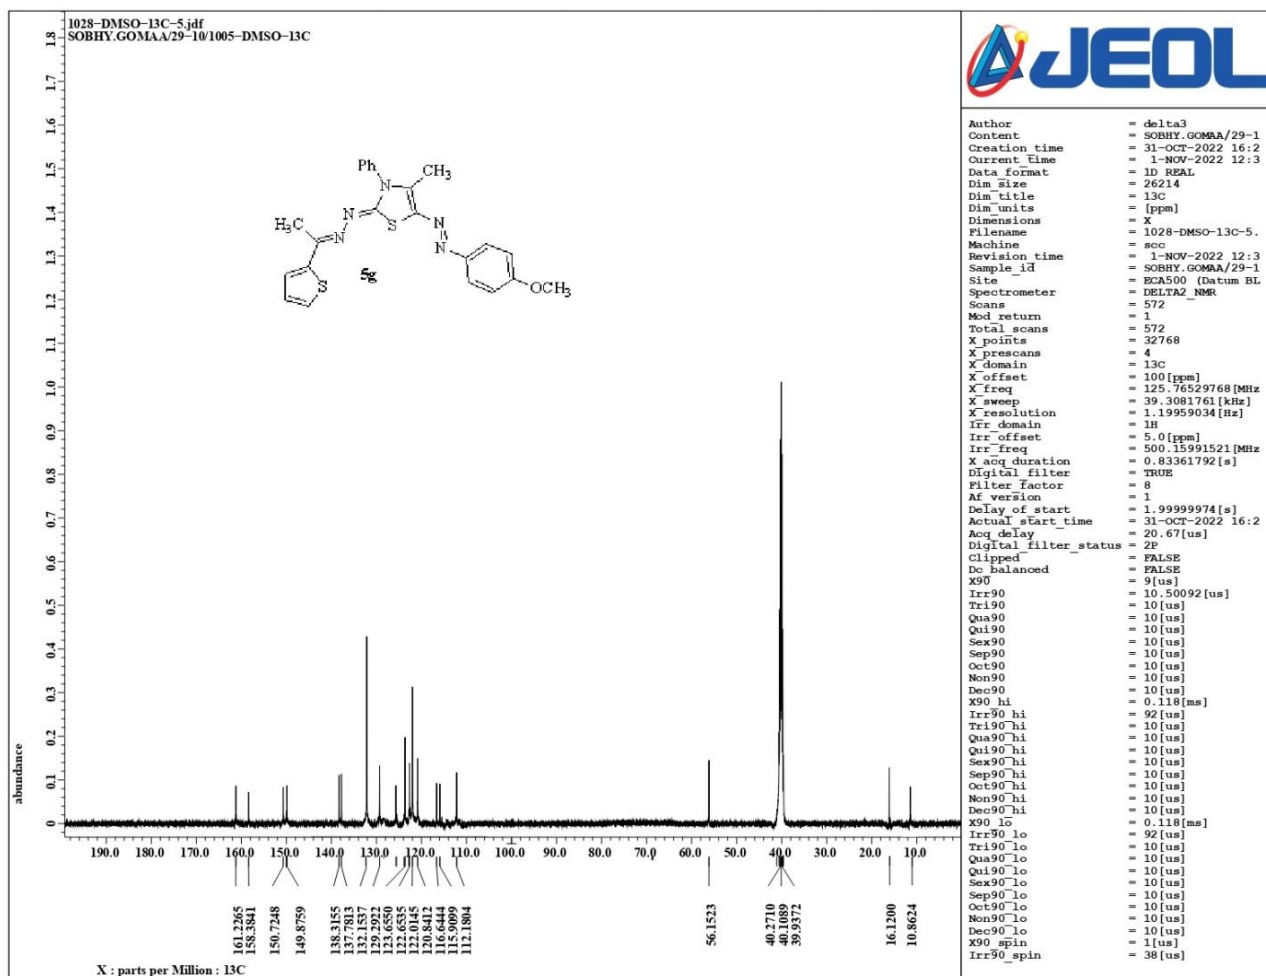

$^{13}\text{C}$ -NMR spectra of compound **5g**

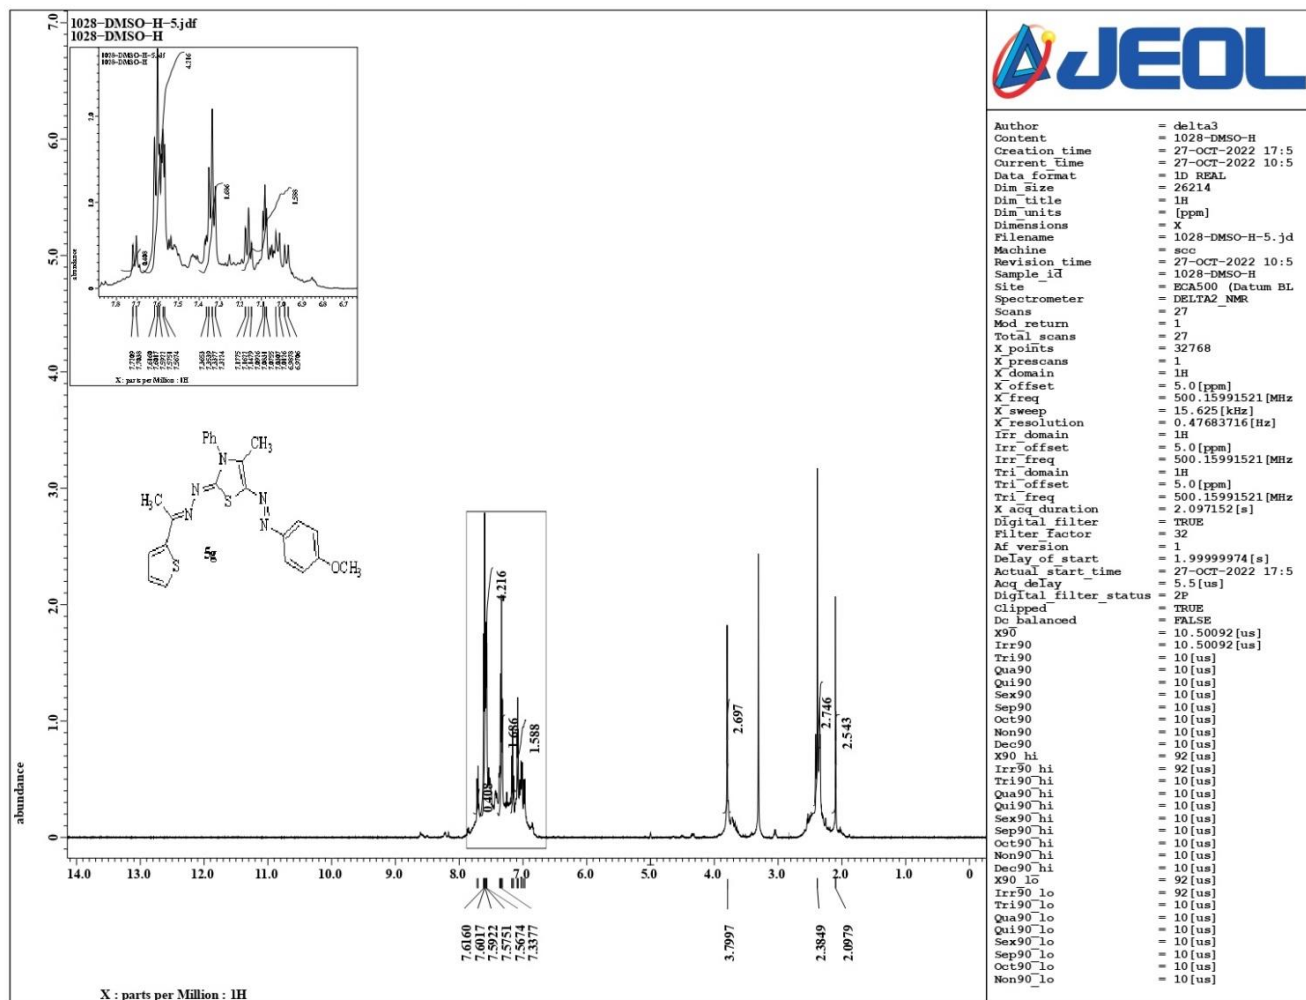

<sup>1</sup>H-NMR spectra of compound **5g**

# Cairo University Micro Analytical Center

## DI Analysis Shimadzu Qp-2010 Plus

### Sample Information

Analyzed by : Dr. Mai Younis  
 Analyzed :  
 Sample Name : 16  
 Sample ID :  
 Customer Name : Dr. Sobhy Goma - Science - Cairo  
 Data File : C:\GCMSSolution\Data\Project1\16.QGD  
 Org Data File : C:\GCMSSolution\Data\Project1\16.QGD  
 Method File : C:\GCMSSolution\Data\Project1\High Temperature Op  
 Org Method File : C:\GCMSSolution\Data\Project1\High Temperature Op  
 Report File :  
 Tuning File : C:\GCMSSolution\System\Tune1\\_default.qgt  
 \$Endf\$Modified by : Dr. Mai Younis  
 Modified :

### Method

==== Analytical Line 1 =====  
 IonSourceTemp : 250.00 °C  
 [MS Table]  
 --Group 1 - Event 1--  
 Start Time : 0.00min  
 End Time : 10.00min  
 ACQ Mode : Scan  
 Event Time : 0.50sec  
 Scan Speed : 1250  
 Start m/z : 50.00  
 End m/z : 600.00  
 Electron Voltage : 70 eV  
 Ionization Mode : EI

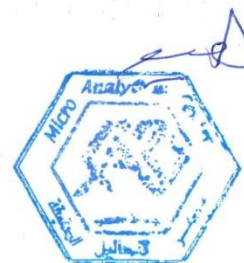

C:\GCMSSolution\Data\Project1\16.QGD

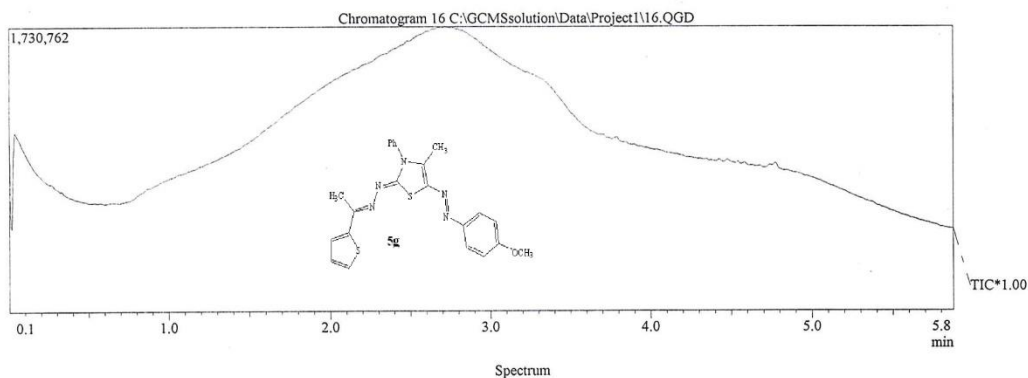

Line#1 R.Time:4.5(Scan#:543)

MassPeaks:

RawMode:Single 4.5(543) BasePeak:57(65527)

BG Mode:None Group 1 - Event 1

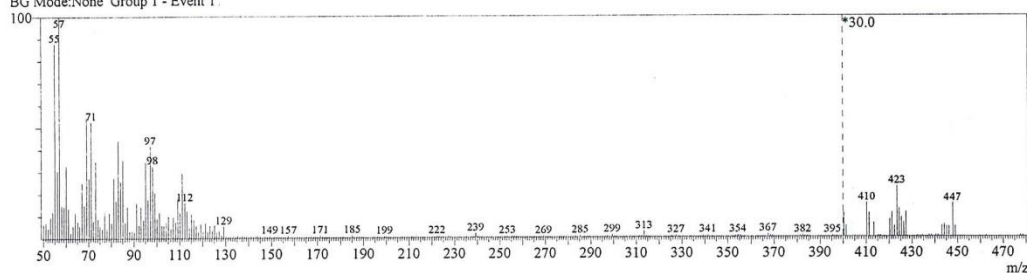

### Mass Table

Line#1 R.Time:4.5(Scan#:543)

MassPeaks:

RawMode:Single 4.5(543) BasePeak:57(65527)

BG Mode:None Group 1 - Event 1

| # | m/z   | Abs. In | Rel. Int. | # | m/z   | Abs. In | Rel. Int. | # | m/z   | Abs. In | Rel. Int. |
|---|-------|---------|-----------|---|-------|---------|-----------|---|-------|---------|-----------|
| 1 | 50.00 | 4110    | 6.27      | 4 | 53.05 | 6241    | 9.52      | 7 | 56.10 | 19844   | 30.28     |
| 2 | 51.00 | 4647    | 7.09      | 5 | 54.10 | 7900    | 12.06     | 8 | 57.10 | 65527   | 100.00    |
| 3 | 52.05 | 2962    | 4.52      | 6 | 55.05 | 57495   | 87.74     | 9 | 58.05 | 9688    | 14.78     |

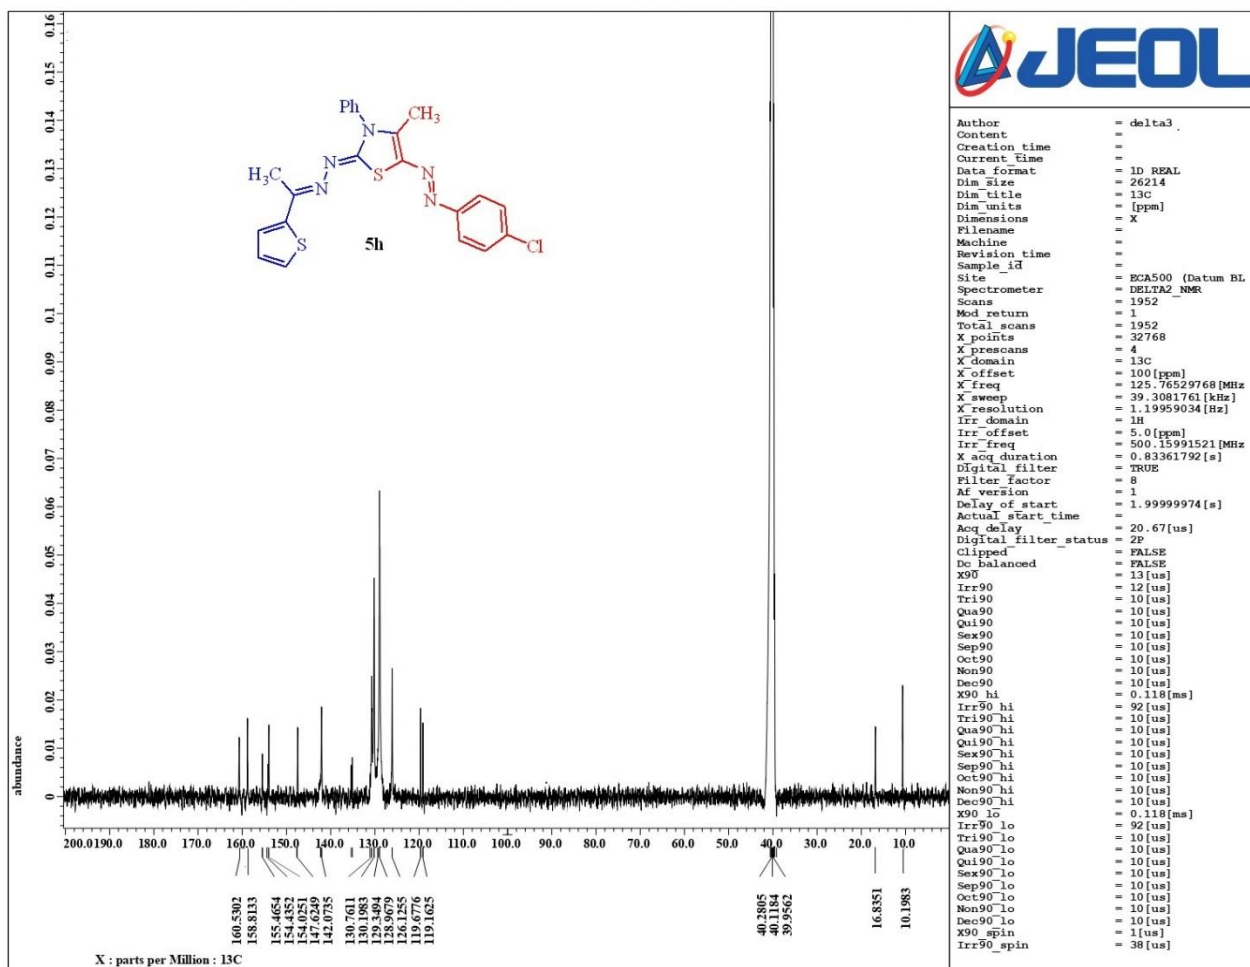

<sup>13</sup>C-NMR spectra of compound **5h**

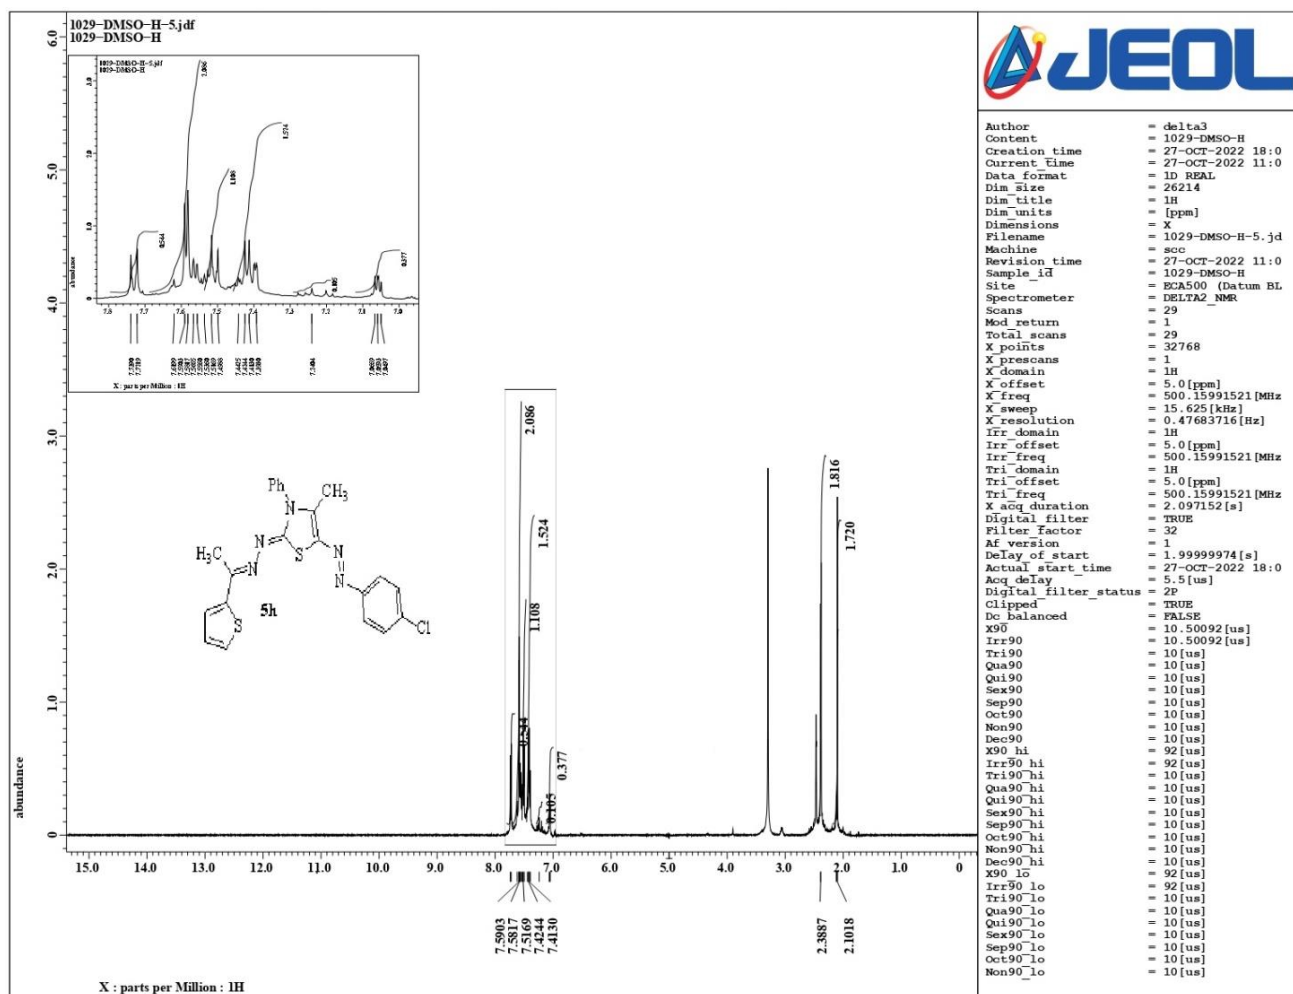

<sup>1</sup>H-NMR spectra of compound **5h**

# Cairo University Micro Analytical Center

## DI Analysis Shimadzu Qp-2010 Plus

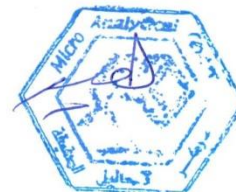

Sample Information  
Analyzed by : Dr. Mai Younis  
Sample Name : 15  
Sample ID :  
Customer Name : Dr. Sobhy Goma - Science - Cairo  
Data File : C:\GCMSSolution\Data\Project1\15.QGD  
Org Data File : C:\GCMSSolution\Data\Project1\15.QGD  
Method File : C:\GCMSSolution\Data\Project1\High Temperature Op  
Org Method File : C:\GCMSSolution\Data\Project1\High Temperature Op  
Report File :  
Tuning File : C:\GCMSSolution\System\Tune1\\_default.qgt  
SEndIfSModified by : Dr. Mai Younis  
Modified :

Method  
Analytical Line 1  
IonSourceTemp : 250.00 °C  
[MS Table]  
--Group 1 - Event 1--  
Start Time : 0.00min  
End Time : 10.00min  
ACQ Mode : Scan  
Event Time : 0.50sec  
Scan Speed : 1250  
Start m/z : 50.00  
End m/z : 600.00  
Electron Voltage : 70 eV  
Ionization Mode : EI

C:\GCMSSolution\Data\Project1\15.QGD

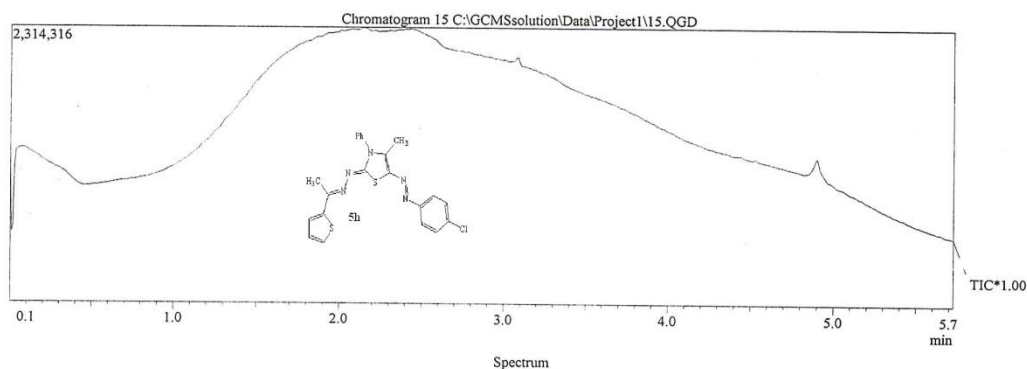

Line#:1 R.Time:3.1(Scan#:368)  
MassPeaks:421  
RawMode:Single 3.1(368) BasePeak:270(47320)  
BG Mode:None Group 1 - Event 1

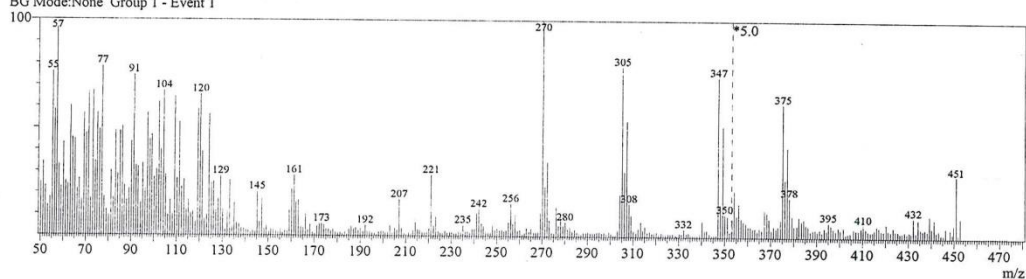

### Mass Table

Line#:1 R.Time:3.1(Scan#:368)

### MassPeaks:

RawMode:Single 3.1(368) BasePeak:270(47320)

BG Mode:None Group 1 - Event 1

| # | m/z   | Abs. In | Rel. Int. | # | m/z   | Abs. In | Rel. Int. | # | m/z   | Abs. In | Rel. Int. |
|---|-------|---------|-----------|---|-------|---------|-----------|---|-------|---------|-----------|
| 1 | 50.05 | 11702   | 24.73     | 4 | 53.05 | 6522    | 13.78     | 7 | 56.10 | 27644   | 58.42     |
| 2 | 51.00 | 16204   | 34.24     | 5 | 54.10 | 8295    | 17.53     | 8 | 57.10 | 45449   | 96.05     |
| 3 | 52.05 | 10901   | 23.04     | 6 | 55.10 | 35964   | 76.00     | 9 | 58.10 | 15687   | 33.15     |

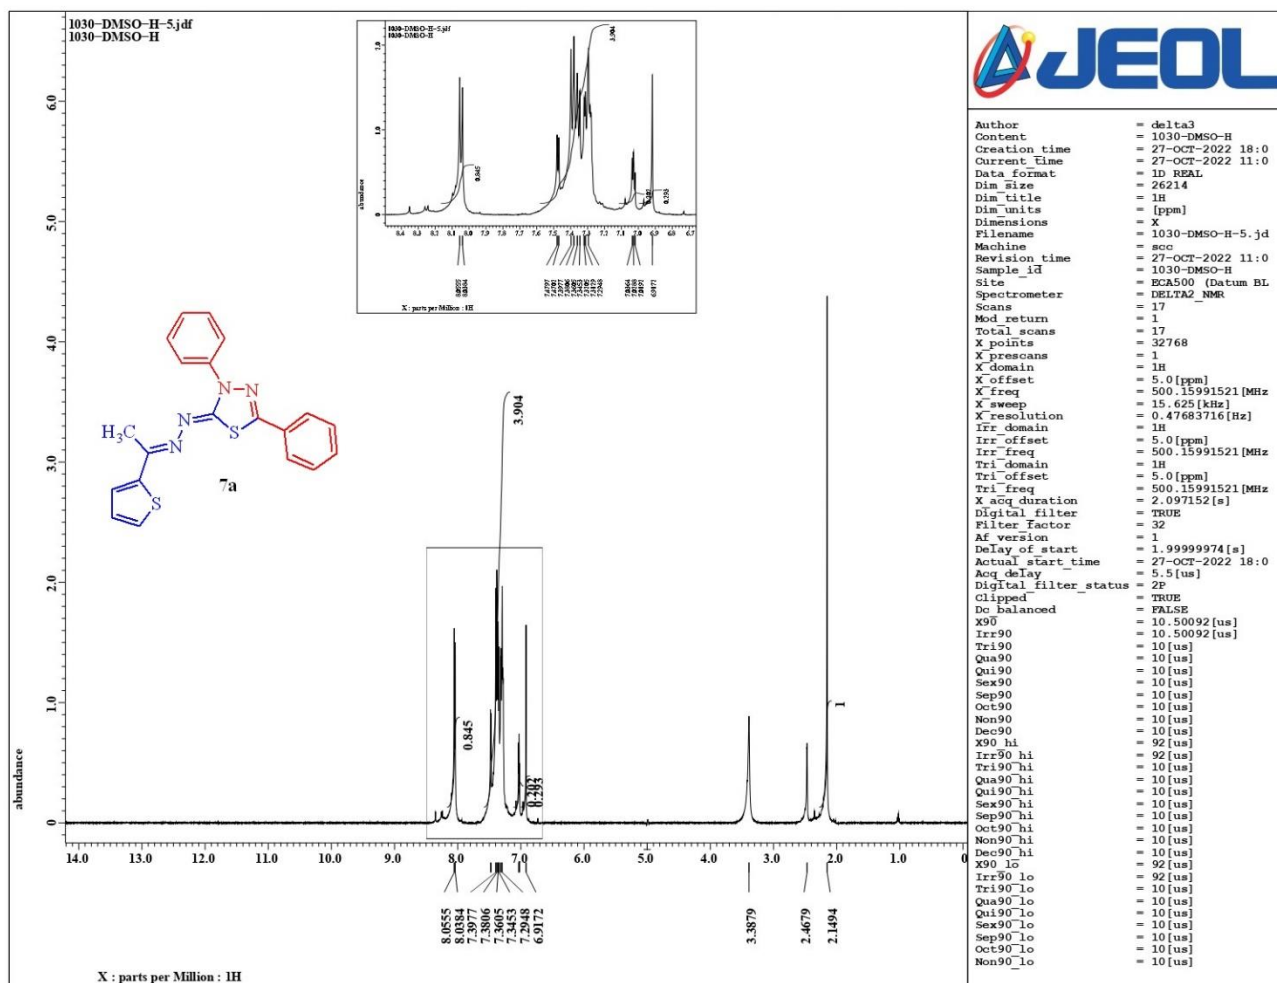

<sup>1</sup>H-NMR spectra of compound **7a**

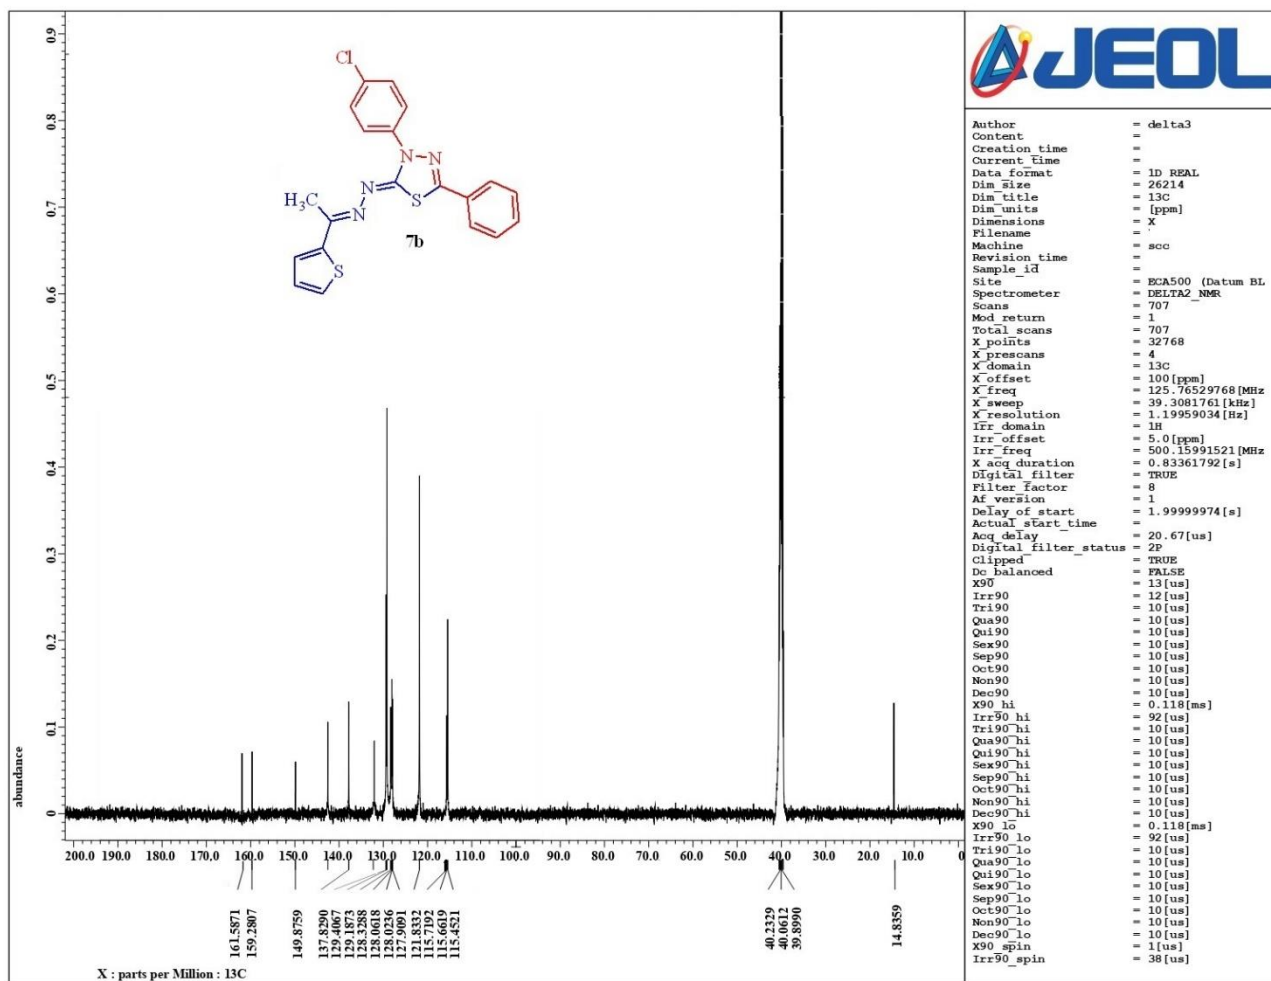

<sup>13</sup>C-NMR spectra of compound **7b**



# Cairo University Micro Analytical Center

DI Analysis  
Shimadzu Qp-2010 Plus

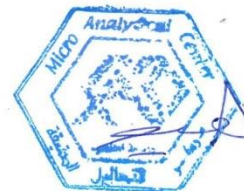

## Sample Information

Analyzed by : Dr. Mai Younis  
Analyzed :  
Sample Name : 9  
Sample ID :  
Customer Name : Dr. Sobhy Goma - Science - Cairo  
Data File : C:\GCMSSolution\Data\Project1\9.QGD  
Org Data File : C:\GCMSSolution\Data\Project1\9.QGD  
Method File : C:\GCMSSolution\Data\Project1\High Temperature Op  
Org Method File : C:\GCMSSolution\Data\Project1\High Temperature Op  
Report File :  
Tuning File : C:\GCMSSolution\System\Tune1\\_default.gct  
\$EndIf\$Modified by : Dr. Mai Younis  
Modified :

## Method

==== Analytical Line 1 =====  
IonSourceTemp : 250.00 °C  
[MS Table]  
--Group 1 - Event 1--  
Start Time : 0.00min  
End Time : 10.00min  
ACQ Mode : Scan  
Event Time : 0.50sec  
Scan Speed : 1250  
Start m/z : 50.00  
End m/z : 600.00  
  
Electron Voltage : 70 eV  
Ionization Mode : EI

C:\GCMSSolution\Data\Project1\9.QGD

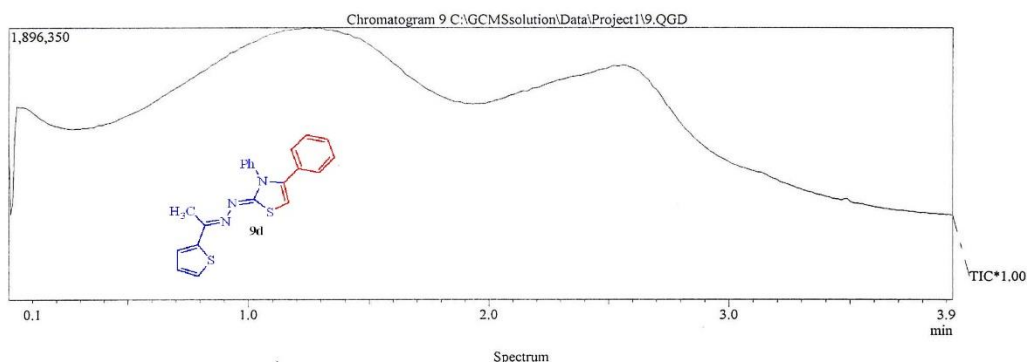

Line#:1 R.Time:1.2(Scan#:147)  
MassPeaks:323  
RawMode:Single 1.2(147) BasePeak:125(130775)  
BG Mode:None Group 1 - Event 1

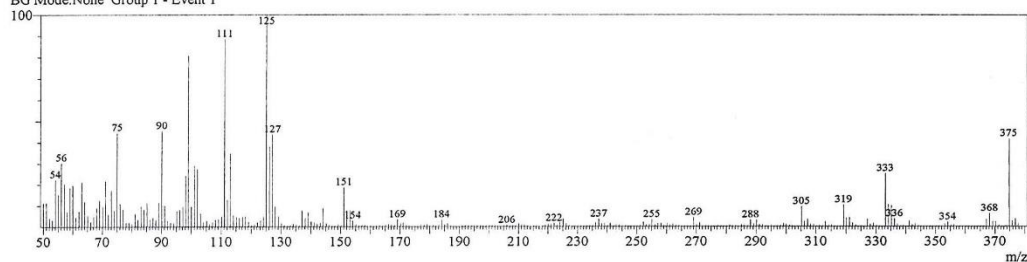

## Mass Table

Line#:1 R.Time:1.2(Scan#:147)

MassPeaks:323

RawMode:Single 1.2(147) BasePeak:125(130775)

BG Mode:None Group 1 - Event 1

| # | m/z   | Abs. In | Rel. Int. | # | m/z   | Abs. In | Rel. Int. | # | m/z   | Abs. In | Rel. Int. |
|---|-------|---------|-----------|---|-------|---------|-----------|---|-------|---------|-----------|
| 1 | 50.00 | 14993   | 11.46     | 4 | 53.05 | 3980    | 3.04      | 7 | 56.05 | 39539   | 30.23     |
| 2 | 51.05 | 14814   | 11.33     | 5 | 54.05 | 29093   | 22.25     | 8 | 57.10 | 26513   | 20.27     |
| 3 | 52.05 | 5476    | 4.19      | 6 | 55.10 | 19772   | 15.12     | 9 | 58.05 | 9223    | 7.05      |

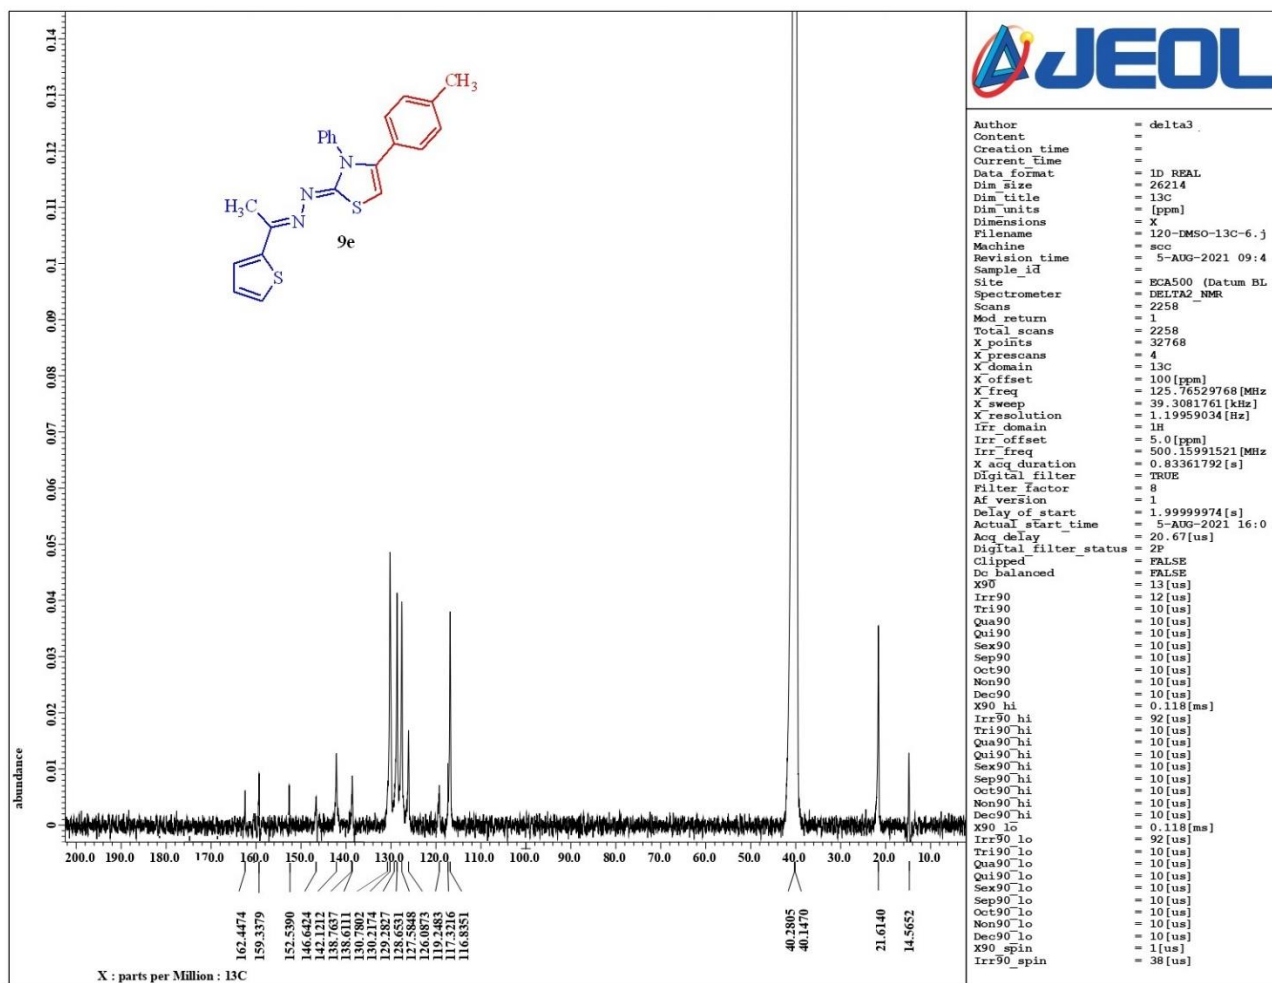

**<sup>13</sup>C-NMR spectra of compound 9e**



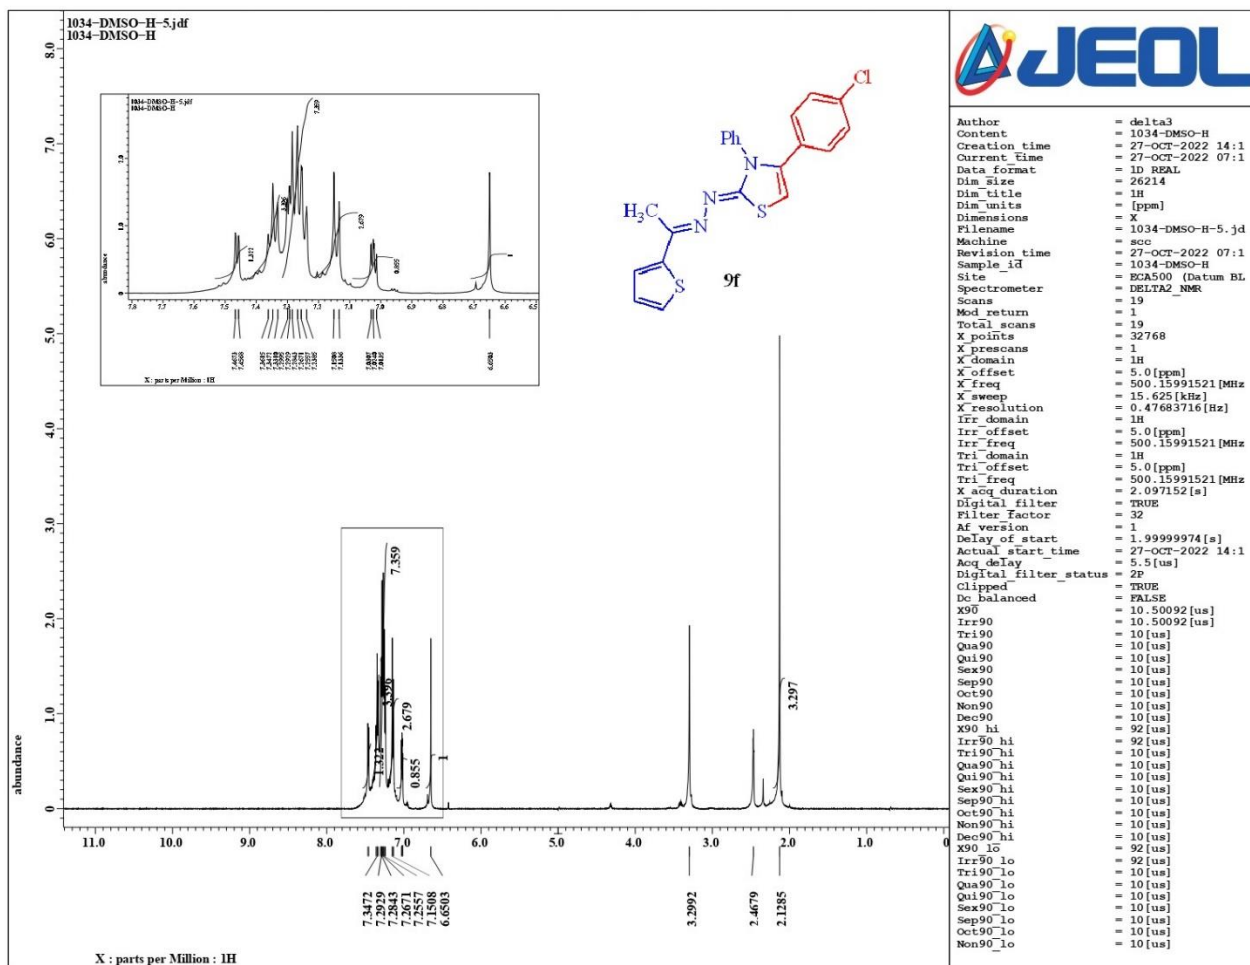

<sup>1</sup>H-NMR spectra of compound **9f**

# Cairo University Micro Analytical Center

## DI Analysis Shimadzu Qp-2010 Plus

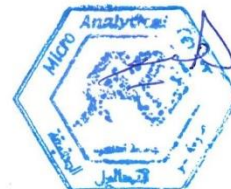

|                           |                                                     |                              |
|---------------------------|-----------------------------------------------------|------------------------------|
| <b>Sample Information</b> |                                                     | <b>Method</b>                |
| Analyzed by               | : Dr. Mai Younis                                    | ==== Analytical Line 1 ===== |
| Analyzed                  |                                                     | IonSourceTemp :250.00 °C     |
| Sample Name               | : 12                                                | [MS Table]                   |
| Sample ID                 |                                                     | --Group 1 - Event 1--        |
| Customer Name             | : Dr. Sobhy Goma - Science - Cairo                  | Start Time :0.00min          |
| Data File                 | : C:\GCMSsolution\Data\Project1\12.QGD              | End Time :10.00min           |
| Org Data File             | : C:\GCMSsolution\Data\Project1\12.QGD              | ACQ Mode :Scan               |
| Method File               | : C:\GCMSsolution\Data\Project1\High Temperature Op | Event Time :0.50sec          |
| Org Method File           | : C:\GCMSsolution\Data\Project1\High Temperature Op | Scan Speed :1250             |
| Report File               |                                                     | Start m/z :50.00             |
| Tuning File               | : C:\GCMSsolution\System\Tune1\_default.qgt         | End m/z :600.00              |
| \$EndIf\$Modified by      | : Dr. Mai Younis                                    | Electron Voltage : 70 eV     |
| Modified                  |                                                     | Ionization Mode : EI         |

C:\GCMSsolution\Data\Project1\12.QGD

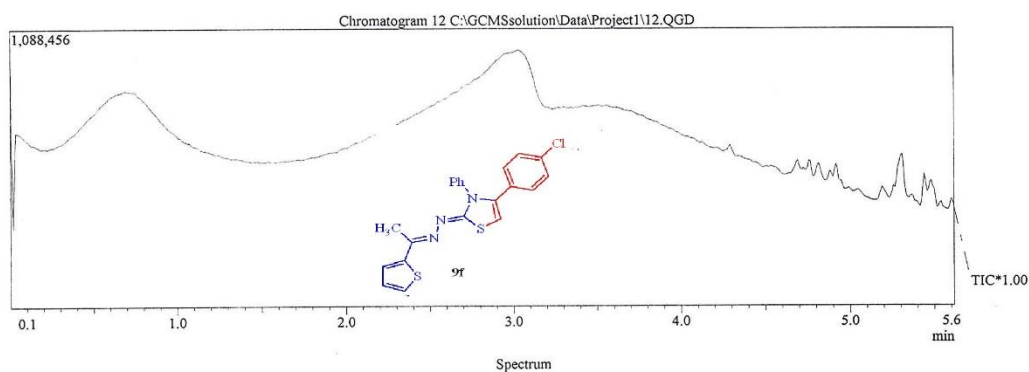

Line#:1 R.Time:3.0(Scan#:366)  
MassPeaks:  
RawMode:Single 3.0(366) BasePeak:57(53964)  
BG Mode:None Group 1 - Event 1

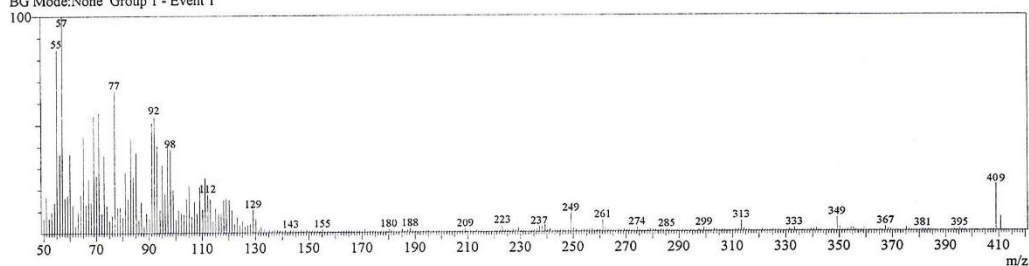

Mass Table  
Line#:1 R.Time:3.0(Scan#:366)  
MassPeaks:  
RawMode:Single 3.0(366) BasePeak:57(53964)  
BG Mode:None Group 1 - Event 1

| # | m/z   | Abs. In | Rel. Int. | # | m/z   | Abs. In | Rel. Int. | # | m/z   | Abs. In | Rel. Int. |
|---|-------|---------|-----------|---|-------|---------|-----------|---|-------|---------|-----------|
| 1 | 50.00 | 3625    | 6.72      | 4 | 53.05 | 5268    | 9.76      | 7 | 56.10 | 19774   | 36.64     |
| 2 | 51.00 | 9014    | 16.70     | 5 | 54.10 | 7558    | 14.01     | 8 | 57.10 | 53964   | 100.00    |
| 3 | 52.05 | 3762    | 6.97      | 6 | 55.05 | 45651   | 84.60     | 9 | 58.10 | 8633    | 16.00     |

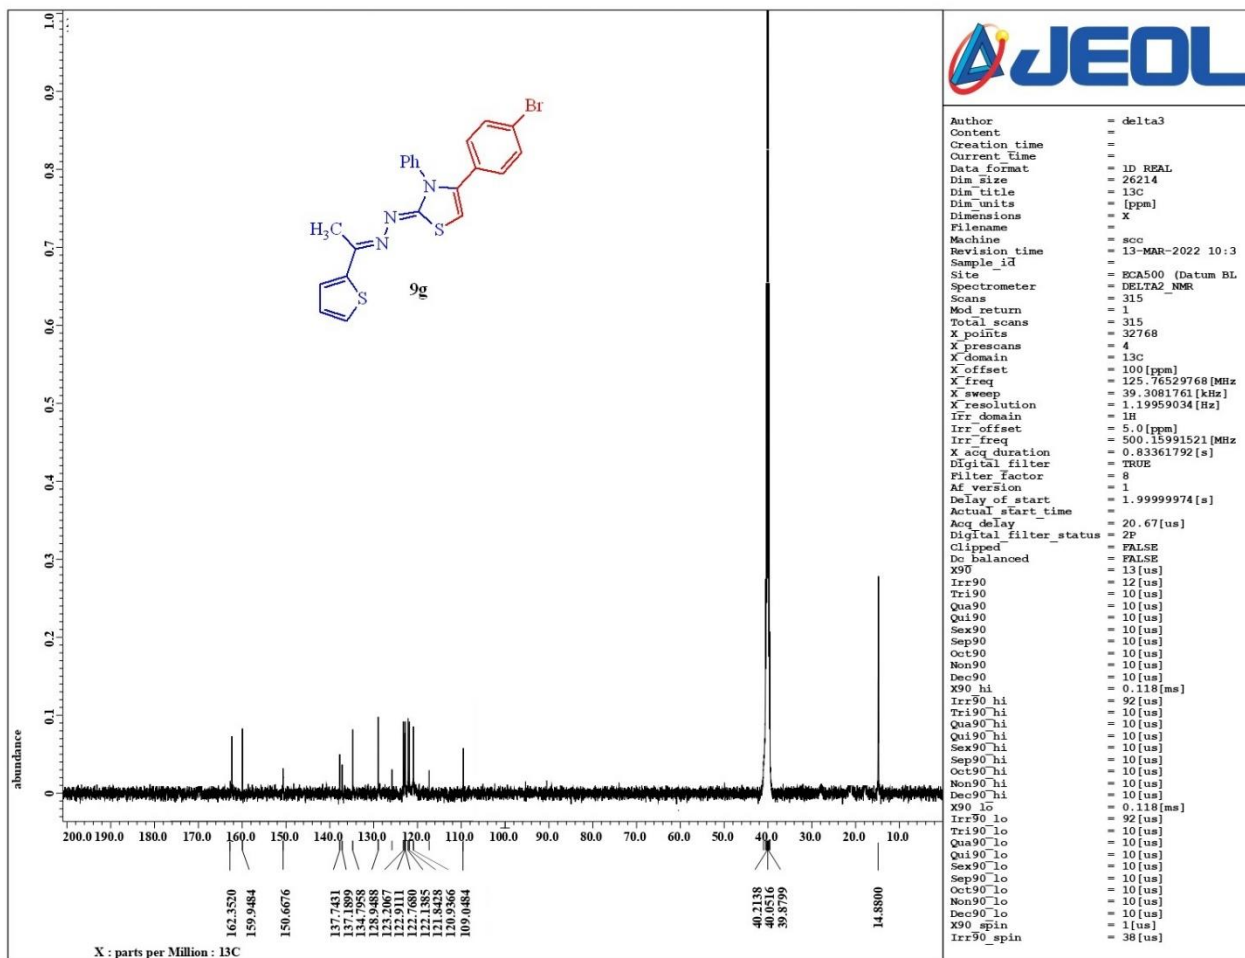

<sup>13</sup>C-NMR spectra of compound **9g**

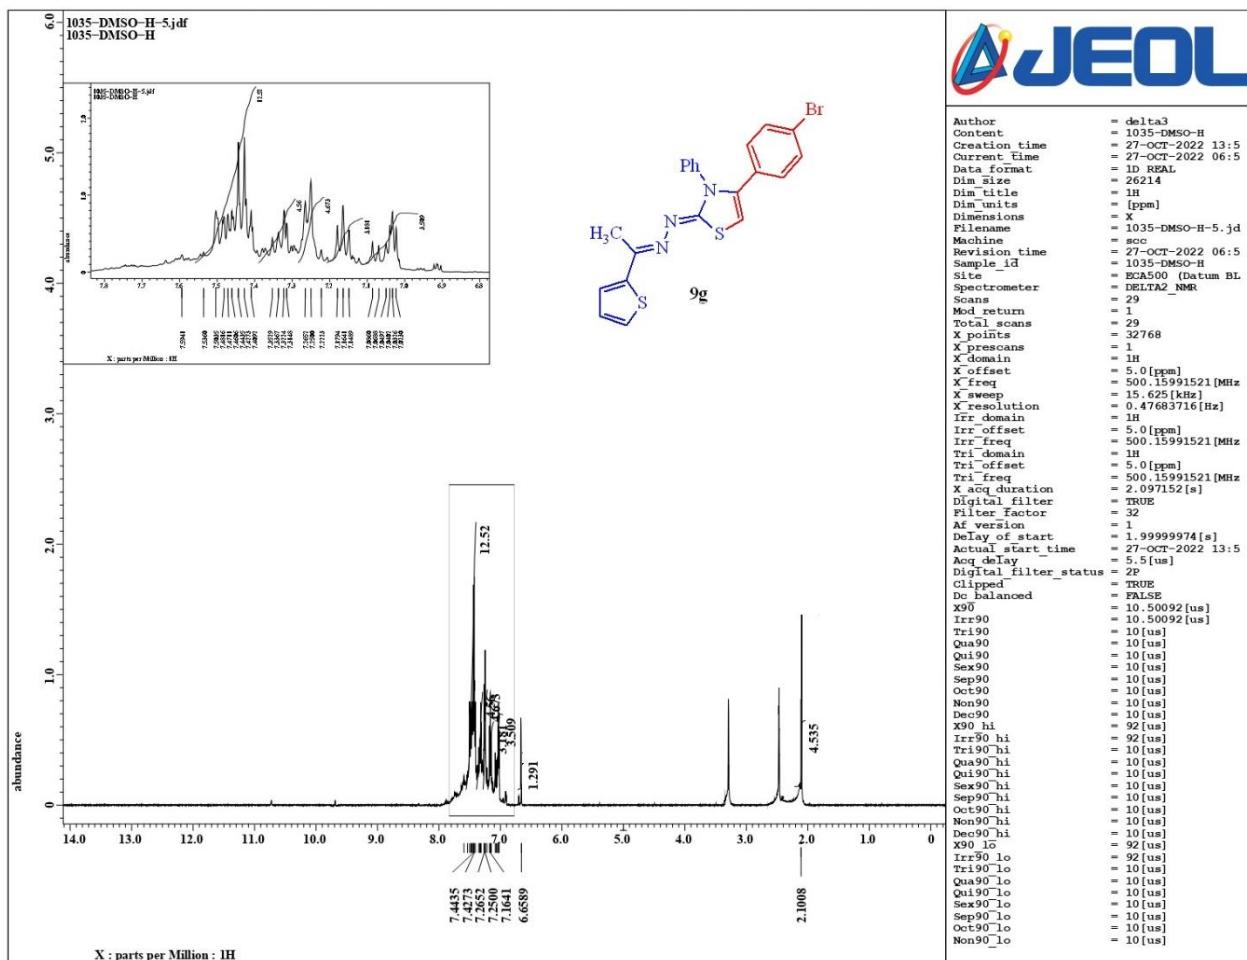

<sup>1</sup>H-NMR spectra of compound 9g

# Cairo University Micro Analytical Center

DI Analysis  
Shimadzu Qp-2010 Plus

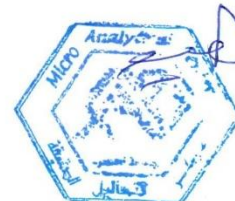

## Sample Information

Analyzed by : Dr. Mai Younis  
Analyzed :  
Sample Name : 14  
Sample ID :  
Customer Name : Dr. Sobhy Goma - Science - Cairo  
Data File : C:\GCMSSolution\Data\Project\14.QGD  
Org Data File : C:\GCMSSolution\Data\Project\14.QGD  
Method File : C:\GCMSSolution\Data\Project\1\High Temperature Op  
Org Method File : C:\GCMSSolution\Data\Project\1\High Temperature Op  
Report File : C:\GCMSSolution\System\Tune\1\_default.qgt  
Tuning File : C:\GCMSSolution\System\Tune\1\_default.qgt  
SEndIfSMModified by : Dr. Mai Younis  
Modified :

## Method

==== Analytical Line 1 =====  
IonSourceTemp : 250.00 °C  
[MS Table]  
--Group 1 - Event 1--  
Start Time : 0.00min  
End Time : 10.00min  
ACQ Mode : Scan  
Event Time : 0.50sec  
Scan Speed : 1250  
Start m/z : 50.00  
End m/z : 600.00  
  
Electron Voltage : 70 eV  
Ionization Mode : EI

C:\GCMSSolution\Data\Project\14.QGD

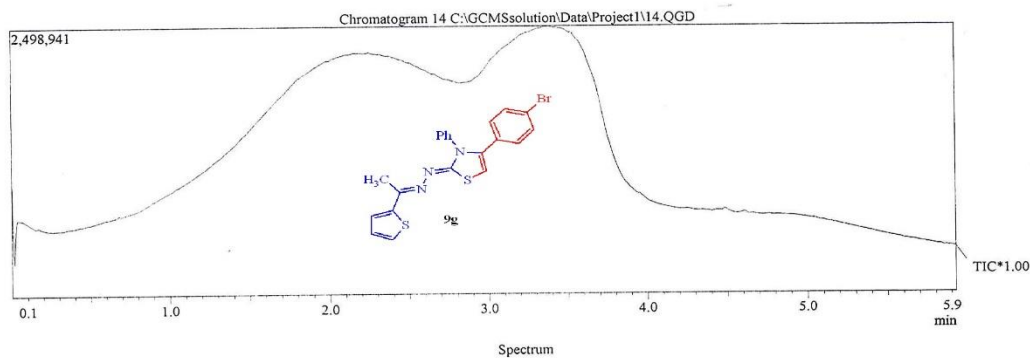

Line#:1 R.Time:3.5(Scan#:416)

MassPeaks:  
RawMode:Single 3.5(416) BasePeak:111(161583)  
BG Mode:None Group 1 - Event 1

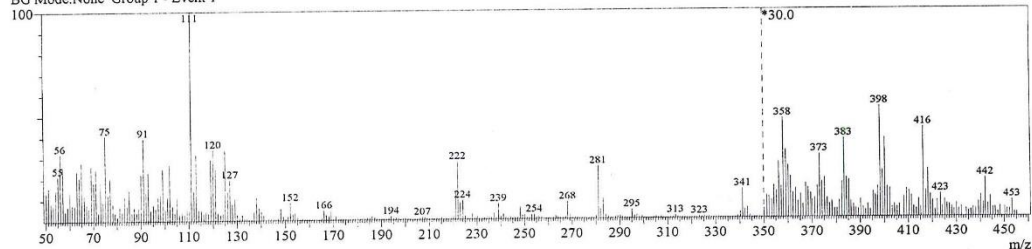

## Mass Table

Line#:1 R.Time:3.5(Scan#:416)

## MassPeaks:

RawMode:Single 3.5(416) BasePeak:111(161583)

BG Mode:None Group 1 - Event 1

| # | m/z   | Abs. In | Rel. Int. | # | m/z   | Abs. In | Rel. Int. | # | m/z   | Abs. In | Rel. Int. |
|---|-------|---------|-----------|---|-------|---------|-----------|---|-------|---------|-----------|
| 1 | 50.05 | 21798   | 13.49     | 4 | 53.05 | 12176   | 7.54      | 7 | 56.05 | 51948   | 32.15     |
| 2 | 51.05 | 25816   | 15.98     | 5 | 54.05 | 23840   | 14.75     | 8 | 57.10 | 42182   | 26.11     |
| 3 | 52.05 | 14096   | 8.72      | 6 | 55.05 | 34620   | 21.43     | 9 | 58.05 | 7632    | 4.72      |

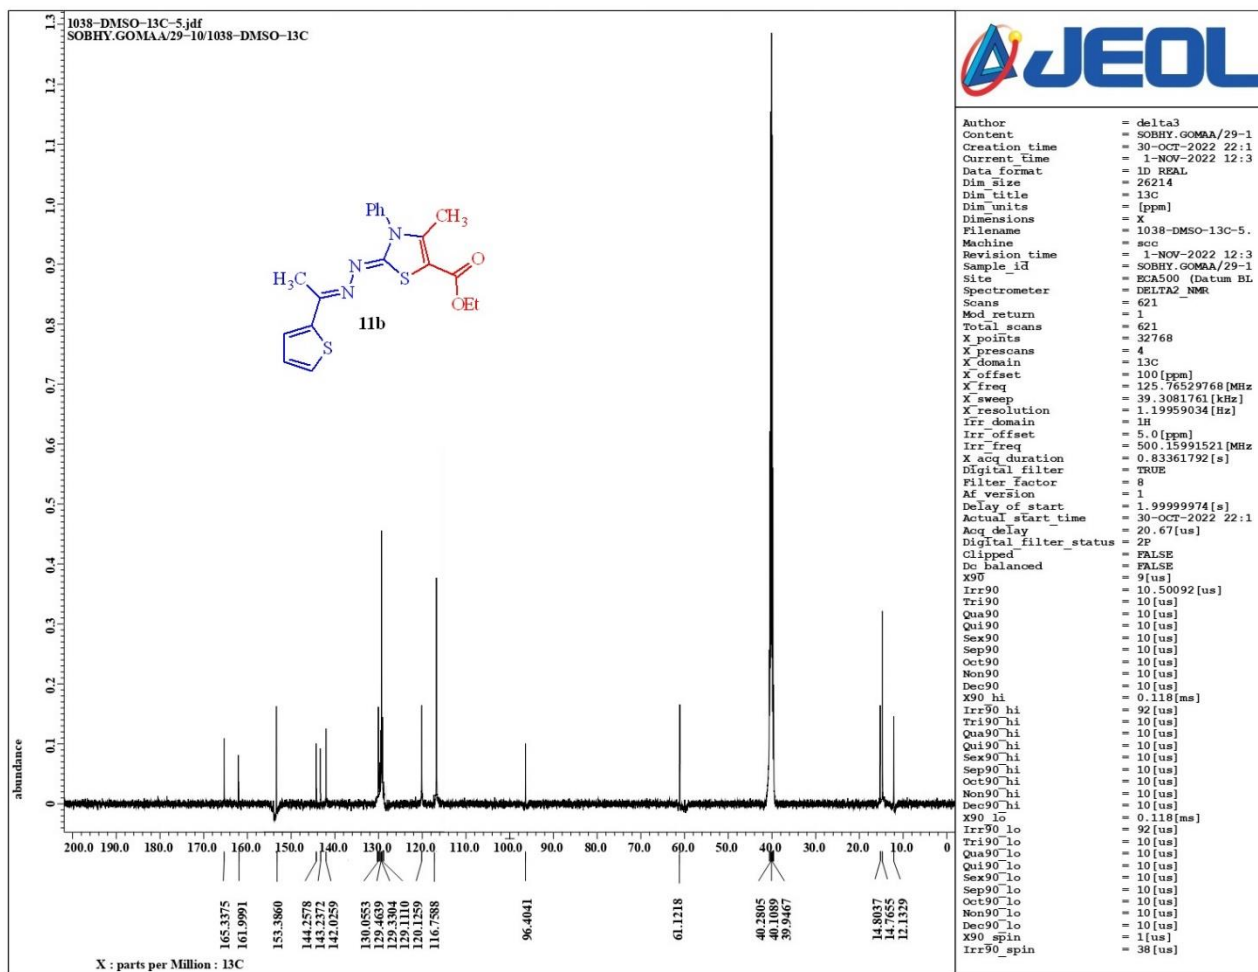

<sup>13</sup>C-NMR spectra of compound **11b**

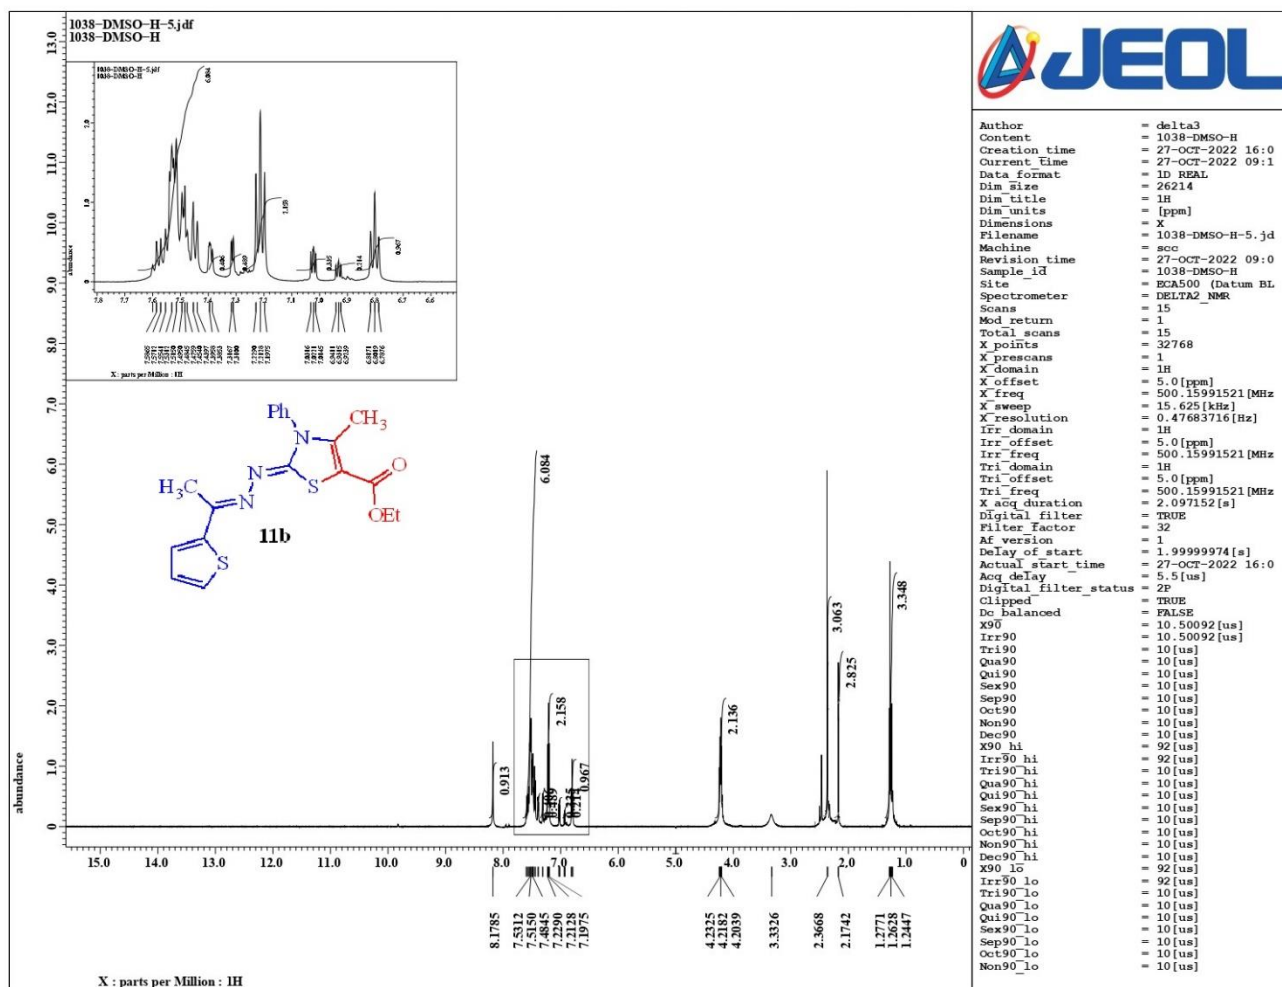

<sup>1</sup>H-NMR spectra of compound **11b**

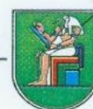

Supplement: s1 [file s1]
